# Supplementary material
Source: PubMed Central journal article supplement (PMC3884769)
Supplement: NIHMS533437-supplement-Supplement.pdf [file NIHMS533437-supplement-Supplement.pdf]

## SUPPLEMENTARY TEXTS

### Text S1

#### Data schemas

This section and **Text S3** describe the provided data and computer programs in sufficient detail to reproduce the results of the paper and to make use of the data and programs in the development and evaluation of new methods. The data are stored in four relational tables:

- `supplement_Object`: one row for each of the 454,793 cells. The primary key (TableNumber, ImageNumber, ObjectNumber) identifies a cell. The pair of columns (TableNumber, ImageNumber) is a foreign key into the `supplement_Image` table. The remaining 476 columns are the 453 measurements as well as 23 measurements that were not used for profiling (e.g., horizontal and vertical position of the cell in the field of view).
- `supplement_Image`: one row for each of the 2,528 fields of view. The primary key (TableNumber, ImageNumber) identifies an image. The pair of columns (Image\_Metadata\_Plate\_DAPI, Image\_Metadata\_Well\_DAPI) indicates the well the image came from. The column `Image_Metadata_Compound` contains the name of the compound the sample was treated with; it is a foreign key into the `supplement_Compound` table. The column `Image_Metadata_Concentration` is the concentration of the compound treatment in M. Together, the pair of columns (Image\_Metadata\_Compound, Image\_Metadata\_Concentration) is a foreign key into the `supplement_GroundTruth` table.
- `supplement_GroundTruth`: one row for each of the 104 compound-concentrations in our ground-truth set. In addition to the primary key (compound, concentration), there is a column `moa` that contains the mechanism of action of the compound. For the mock treatment DMSO, the `moa` column contains “DMSO”.
- `supplement_Compound`: one row for each of the 39 compounds in our ground-truth set. In addition to the primary key compound, there is a column `smiles` that contains the chemical structure of the compound. For four of the compounds proprietary to AstraZeneca, structures are not available. No structure is provided for the mock treatment DMSO.

We provide the data as tab-delimited text files, together with SQL statements and scripts for importing them into a MySQL database. Although our scripts expect to read the data from a MySQL database, the text files can also be used directly. The ZIP file that contains the text files is 754 MB. Unpacked, the text files are 2.1 GB. Imported into the database, the tables are 835 MB.

The script `load_supplement_tables.sh` produces a sequence of SQL statements to create the necessary tables and import the data from the text files. It takes as argument the directory that contains the text files. Run the script, then send its output to MySQL. If you prefer, you can create the tables using the `.sql` files in the zip file, then import the data by issuing `LOAD`

`DATA INFILE` statements manually to MySQL.

### Text S2

#### Implementations

The profiling scripts are written in Python as part of CellProfiler Analyst (CPA), and depend on the following freely-available python modules:

- numpy 1.5.1
- CellProfiler Analyst (<http://github.com/CellProfiler/CellProfiler-Analyst/>) rev. e33def16b2
- scipy 0.7.1
- progressbar 2.3
- sklearn (scikits.learn) 0.12
- MySQL-python 1.2.3
- MDP toolkit 3.3

The visualization scripts additionally require matplotlib 1.2. Unless otherwise noted, all dependencies are available through the Python Package Index (PyPi, <http://pypi.python.org/pypi/>).

Data access is directed by the CellProfiler Analyst properties file `supplement.properties`. You should modify this file to contain the hostname, etc., for your database server.

All script can be run with the `-h` option to see a comprehensive list of options and arguments.

**Cache:** Before you can run any profiling scripts, you must make a binary cache of the per-cell data using `cpa.profiling.cache`, as follows:

```
python -m cpa.profiling.cache \  
    supplement.properties /path/to/cache \  
    "Image_Metadata_Compound = 'DMSO' "
```

The arguments are the CPA properties file, the directory in which to store the cache, and a SQL predicate that identifies the images of mock-treated samples, which will be used as reference for normalization (see Online Methods).

**Subsampling:** The GM profiling method and the preprocessors construct their models using a subsample of the cells. The script `subsample` creates such a subsample. It takes four positional arguments (CPA properties file, cache directory, subsample output file, and the number of cells to include in the subsample). The `-f` option can be used to specify a CPA filter to select the cells to sample from.

**Preprocessors:** The scripts `cpa.profiling.factor_analysis`, `cpa.profiling.pca`, and `cpa.profiling.fasel` construct models that the profiling scripts can use to preprocess the image features. All three scripts take the same positional arguments:

- the filename of a subsample,
- model size (the number of factors or principal components), and
- an output file in which to store the model.

**Profiling scripts:** The profiling scripts are:

- `cpa.profiling.profile_mean`
- `cpa.profiling.profile_ksstatistic`
- `cpa.profiling.profile_svmnormalvector`
- `cpa.profiling.profile_gmm`
- `cpa.profiling.profile_factoranalysis_mean`

All take the following positional arguments:

- CPA properties file
- Cache directory
- CPA group defining sets of images to be profiled together

In addition, all take the following options:

- `--multiprocessing` (run on multiple CPUs or CPU cores)
- `--lsf-directory` *TEMPORARY-DIRECTORY* (run in parallel on a computing cluster using LSF)
- `-o` *OUTPUT-FILENAME* (file to store the profiles in)
- `-f` *FILTER-NAME* (CPA filter indicating which images to profile)

As an example, the following command profiles each well (sample) of the experiment using the “means” method:

```
python -m cpa.profiling.profile_mean \
-o my_mean_profiles.txt -f noncontrols \
supplement.properties /path/to/cache Well
```

The `profile_ksstatistic` and `profile_svmnormalvector` scripts expect an additional positional argument: the name of a CPA filter that defines the images that are of mock-treated samples, to serve as reference distribution for the KS statistic and negative training samples for the SVM. The `profile_svmnormalvector` script accepts the additional option `--rfe`, which indicates that recursive feature elimination should be used. The `profile_gmm` script accepts the additional option `--components` *NCOMPONENTS*, which specifies the number of mixture components. The `profile_factoranalysis_mean` script accepts the additional options `--factors` *NFACTORS*, which specifies the number of factors, and `--save-model` *FILENAME*, which indicates that the model should be saved to file.

**Post-processing scripts:** The script `cpa.profiling.median_profiles` groups a set of profiles according to a CPA filter given as an argument and computes the median profile in each group. The script expects three positional arguments: the properties file, the filename of the profiles to read (generated by one of the profiling scripts), and the name of the CPA filter to group by. The option `-o` *OUTPUT-FILENAME* causes the median profiles to be written to the specified file. As an example, the following command computes profiles for each compound-concentration as the median of the replicate samples:

```
python -m cpa.profiling.median_profiles \
-o my_mean_profiles_per_treatment.txt \
supplement.properties /path/to/cache \
CompoundConcentration
```

The script `cpa.profiling.leave_one_out` performs nearest-neighbor classification with leave-one-out crossvalidation. It expects three positional arguments: the properties file, the path to the cache, and the name of a CPA filter that specifies the true class of each image. The option `-h` *HOLDOUT-GROUP* specifies a CPA group that defines which profiles to hold out when classifying a profile. As an example, the following command classifies per-treatment profiles, holding out all profiles treated with the same compound as the one being classified,

even if those other profiles were treated with a different concentration, and prints the confusion matrix in sparse form to standard output:

```
python -m cpa.profiling.leave_one_out \
-H Compound supplement.properties \
my_mean_profiles_per_treatment.txt MOA
```

The scripts `plot_profiles` and `plot_distances` provide rudimentary visualization of profiles and the distances between them. To plot per-treatment profiles, group and label them by MOA, and output a PDF file:

```
python -m cpa.profiling.plot_profiles \
-o profiles.pdf \
supplement.properties \
mean_profiles_per_treatment.txt MOA
```

To plot the distance matrix of the profiles, grouped and labeled by MOA, and output a PNG file:

```
python -m cpa.profiling.plot_distances \
-o distance_matrix.png \
supplement.properties \
mean_profiles_per_treatment.txt MOA
```

## Text S3

### Computer programs

The file `reproduce.zip` contains four directories: `inputs` contains source data for Figure S 9; `src` contains the source code, `properties` contains the CPA properties file, and `outputs` contains the generated data files.

The GNU makefile `src/Makefile` encodes every step to recreate the results, so typing `make` in the `src` directory will recreate all the output files.

The scripts require CellProfiler Analyst (which include the implementations of the profiling method). In addition, most scripts require `matplotlib` 1.1.0, and `calculate_aucs.py` requires `xalglib` 3.4.0 (<http://www.alglib.net/>).

The scripts in the `src` directory are as follows:

- `mean_confusion_fa.py` computes the mean confusion of the 20 factor-analysis models.
- `mean_confusion_gmm.py` computes the mean confusion of the 20 Gaussian mixture models.
- `pretty-confusion-matrix.py` renders a confusion matrix as a PDF file.
- `gmm_varycomponents_plot.py` plots Figure S 5).
- `fa_varyfactors_plot.py` plots Figure 2.
- `loo_confusion.py` processes the data from Loo et al.<sup>15</sup> for use in Figure S 9.
- `make_features_table.py` generates Table S 1.
- `make_ground_truth_table.py` generates Table S 2.
- `make_compounds_table.py` generates Table S 3.
- `make_aucs_pvalues_table.py` generate Table S 10.
- `calculate_aucs.py` calculates AUCs and p-values for Table S 10.
- `misclassified.py` lists compound-concentrations that were misclassified.

## Text S4

### Classification bias from batch and plate effects

The samples were prepared and imaged in 10 batches. If the compounds with one mechanism of action were entirely in a different batch than other mechanisms, there would be a concern that they may be discernible due to differences between batches rather than biological differences<sup>20</sup>. In this experiment, however, all MOAs except two are split between two or more batches (Table S 9). The exceptions are cholesterol-lowering drugs and kinase inhibitors, which are represented only in one batch each, but because other mechanisms are also represented in these batches, there is no reason to believe that the classification is biased by batch effects.

## Text S5

### Previous comparisons by classification accuracy

Loo et al.<sup>15</sup> evaluated their method, which includes the SVM normal-vector method at its core, applying four label sets to a compound set different from ours. Based on the nearest-neighbor search results in their Supplementary Data 2, we calculated classification accuracies for their experiments, and found them to be in the range of 32–51%, depending on the marker set (Figure S 9). If the best marker set is chosen for each mechanistic class, the accuracy increases to 68%.

Kümmel et al.<sup>26</sup> assessed several dimensionality-reduction methods and well-summary approaches in a screening context: the methods were evaluated by their ability to distinguish cells treated with each of five compounds from mock-treated cells. Although the study did not measure ability to distinguish compounds from each other, it is interesting to note that the KS statistic was found to perform similarly to a simple median method. Factor analysis led to a decrease in accuracy, although they only measured 29 features of each cell, so compared to our experiment it is more likely for useful variation to be restricted to a single measurement, and therefore to be discarded as noise.

## Text S6

### Comparison by p-value of AUC

The papers that presented the KS, SVM, and GMM methods include comparisons to previous methods. Here, we describe the method of comparison and explain why we compare the methods using a different method. For the sake of completeness, we summarize the previously published comparison results and apply the same method to our dataset, using our implementations of the core parts of the profiling methods.

**Method of comparison:** In all three papers the performance of a profiling method is quantified in a screening context, using the distances between compounds as follows. If the profiling method worked as desired, the distances between compounds with the same MOA should be smaller than the distances between compounds with different MOA. Therefore, two sets of distances are calculated: pair-wise distance between members of a mechanistic group (the intra-set distance) and pair-wise

distances between members of different mechanistic groups (the inter-set distances). To test whether the former are significantly larger than the latter, a Mann–Whitney U test is performed (Ott, R.L., Longecker, L. (2001) *An Introduction to Statistical Methods and Data Analysis*, 5th ed., ISBN 978-0-534-25122-2).

The Mann–Whitney U test assumes that the data are independent and drawn from distributions with identical shape. (The distributions can differ in position.) This assumption is problematic because it is unlikely that the intra-set and inter-set distance will have distributions of similar shape: the intra-set distances most likely form a narrow distribution, whereas the inter-set distances will be more dispersed because some mechanisms are more different than others. Say, for instance, that of the twelve MOAs, ten are very distinct and two are very similar according to the calculated profiles. The p-values for the two similar MOAs calculated using the Mann-Whitney U test are still very small, as the medians of the intra-set and inter-set distances are so different. It is, however, impossible to definitively classify a sample in either one of the two similar MOAs.

We chose instead to compare the methods by classification accuracy because that measure is more relevant for profiling experiments, which aim to distinguish multiple phenotypes. If two MOAs appear identical based on their profiles, their prediction accuracies will be around 50%.

**Summary of previous comparison results:** Perlman et al.<sup>14</sup> compare the Translation Invariant Similarity Score (TISS) method, which includes the KS method as its core, to the means method. The comparison takes only the total-intensity measurements into account, not the other measurements. The p-values are listed for nine mechanisms of action. The KS method has markedly lower p-values for five of the nine MOAs, and the mean method has markedly lower p-values for three of the nine MOAs.

Loo et al.<sup>15</sup> and Slack et al.<sup>18</sup> compare the SVM and GMM methods, respectively, to TISS. The SVM method using each of four markers sets separately is compared to TISS using all markers sets simultaneously. The SVM method appears to work better overall based on the p-values, but the combining of the marker sets for TISS makes a conclusive comparison impossible. The GMM method is compared to TISS using the same images but different features sets. This makes it difficult to tell if a change in p-value is caused by a different method or a different feature set. The GMM method has significantly lower p-values than TISS for three out of nine MOA; the inverse is true for one MOA. The remaining five MOAs have comparable p-values.

**Comparison of core methods by p-value:** We computed areas under the ROC for each of the five profiling methods (Table S 10). For factor analysis, the p-values are 0.0001 or below for every MOA. The other four methods yield slightly higher p-values for compounds that cause protein degradation. The means method yields higher p-values for actin disruptors. The GM method yields higher p-values for actin disruptors and cholesterol-lowering compounds.

## Text S7

### Most influential variables

In order to measure of how influential each variable is in distinguish each MOA from the rest (Table S 5), we first computed per-MOA profiles as element-wise medians of the profiles of the wells treated with compounds labeled as having that MOA. We then rank the variables, for each MOA profile, by the element-wise minimum distance to any other MOA profile.

## Text S8

### Number of factors

Why is 50 factors optimal in our experiment when Young et al.<sup>19</sup> use 6 factors? First of all, the number 6, which was suggested by the Kaiser criterion, is a somewhat arbitrary cutoff: it is simply the threshold where an additional factor would contain less information than an average feature. It is entirely possible that a few more factors would have led to more discriminative profiles, but in Young et al.'s paper, interpretability of the factors is important, so it makes sense to choose a relatively low number of factors.

Even if Young et al. were to choose their number of factors based on performance in an analytic task (such as classification), they could not have found more than 36 factors because they only measured 36 features. In contrast we measure 453 features. Although there are unquestionably redundancies in our feature set, it seems reasonable to assume that the rich feature set would allow us to detect additional effects on cells—effects that are too subtle/complex to be interpretable, but which nevertheless help in classification. It may also matter that we have an actin stain and a tubulin stain, and that we therefore are able to measure cellular morphology. (Young et al. only measured nuclear features.) A number of factors around 50 is consistent with our experience with training boosting classifiers for particular phenotypes in a screening context, where classifiers with 20 rules work well but adding up to about 50 rules helps<sup>5</sup>.



## **SUPPLEMENTARY DATA**

**Data S1:** `pipelines.zip` – CellProfiler pipelines for processing the images. There are two pipelines, one that computes illumination-correction functions per plate, and one that applies the illumination correction functions to images and analyzes them. The pipelines are provided in both human-readable and machine-readable format.

**Data S2:** `database.zip` – Measurements and metadata in CSV format, as well as a script for loading them into a MySQL database, as described (**Text S1**).

**Data S3:** `reproduce.zip` – Input data and source code for regenerating the figures, tables, and results (**Text S3**).

## SUPPLEMENTARY FIGURES

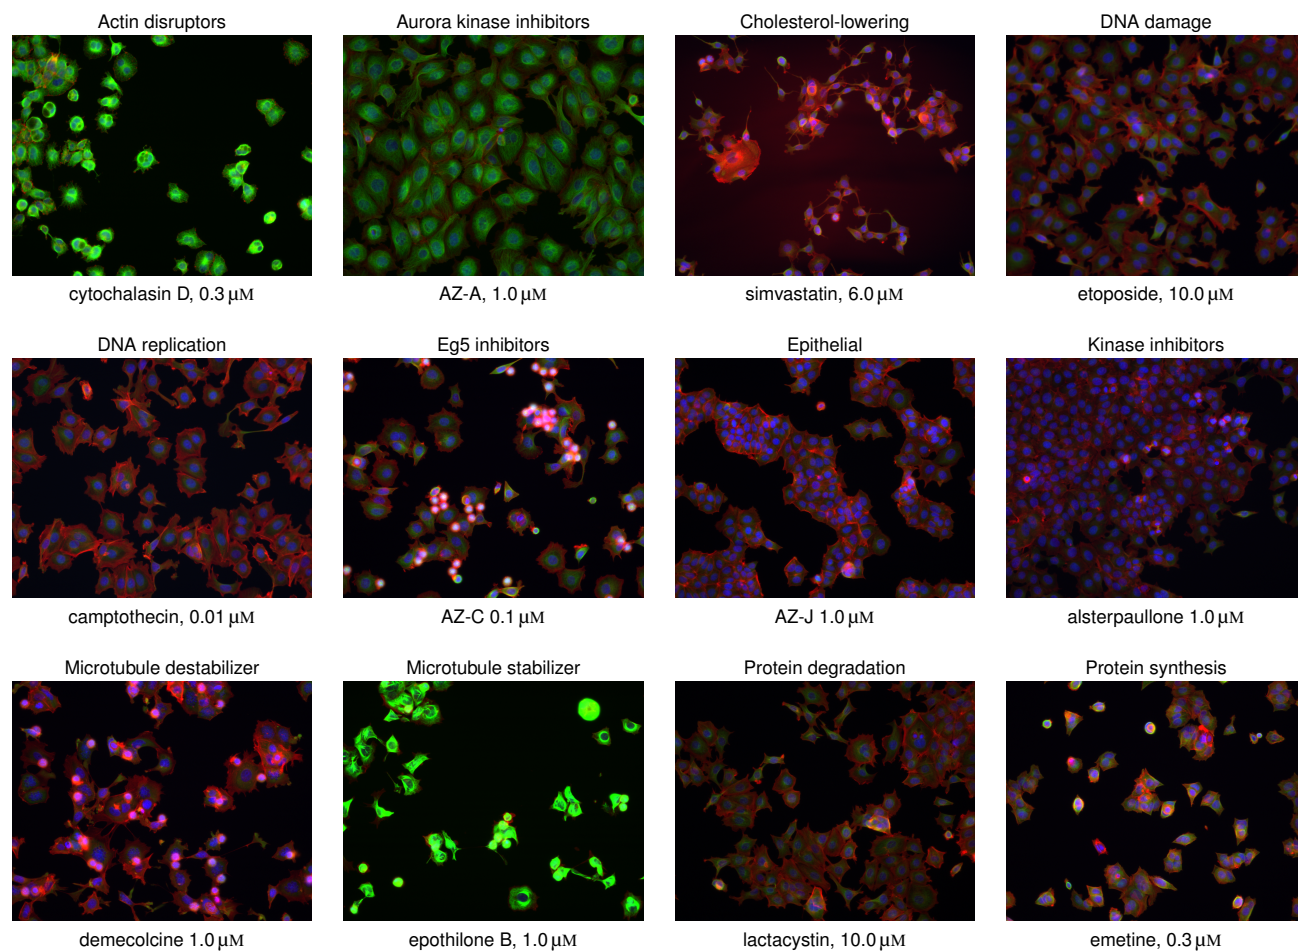

**Figure S1:** Images of one compound-concentration in each of the 12 MOAs spanned by our ground-truth set. Red color shows F-actin, green shows  $\beta$ -tubulin, and blue shows DNA.

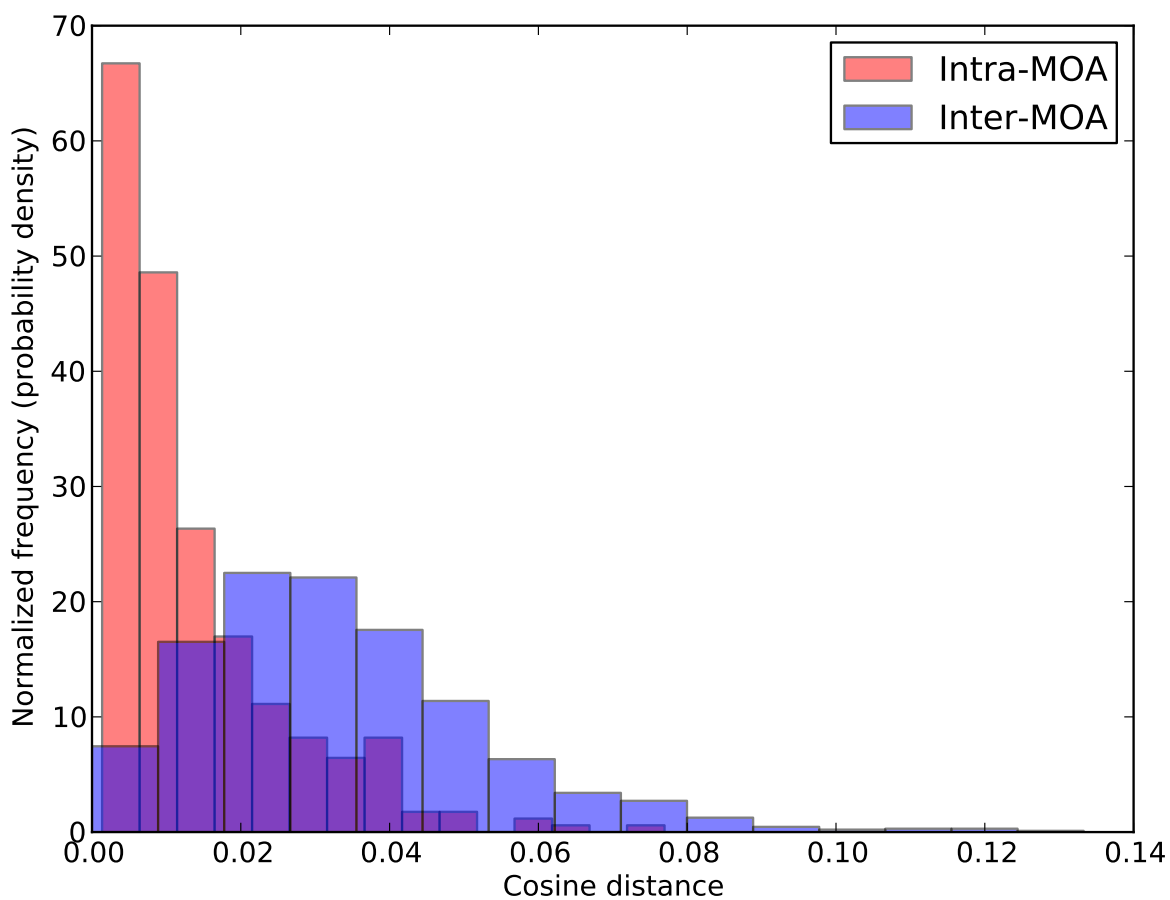

**Figure S2:** Histograms of distances between compound-concentrations that have the same MOA and between compound-concentrations that have different MOA. These distances are between profiles produced by the “means” method; the other methods produced histograms that were not dramatically different.

**A: Means**

True mechanistic class

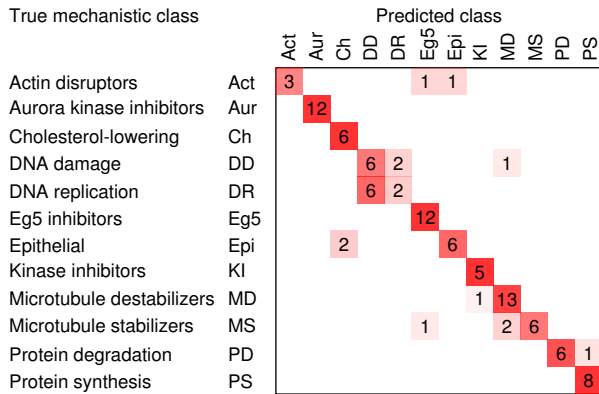

Overall accuracy: 85 / 103 = 83 %

**B: Mode**

True mechanistic class

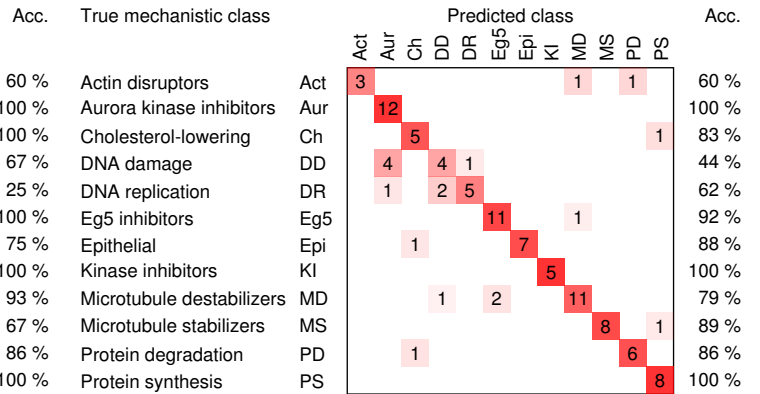

Overall accuracy: 85 / 103 = 83 %

**C: Median**

True mechanistic class

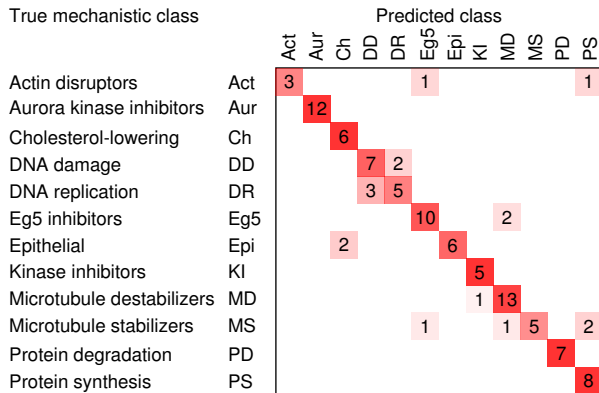

Overall accuracy: 87 / 103 = 84 %

**D: Median + MAD**

True mechanistic class

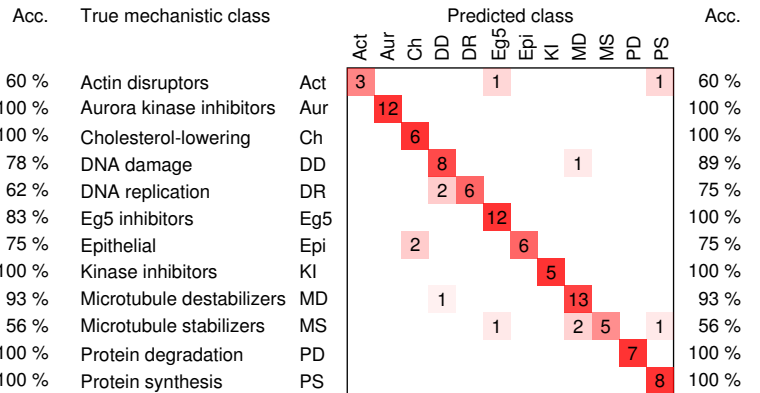

Overall accuracy: 91 / 103 = 88 %

**Figure S3:** Confusion matrices for other population statistics.

### A: Means

True mechanistic class

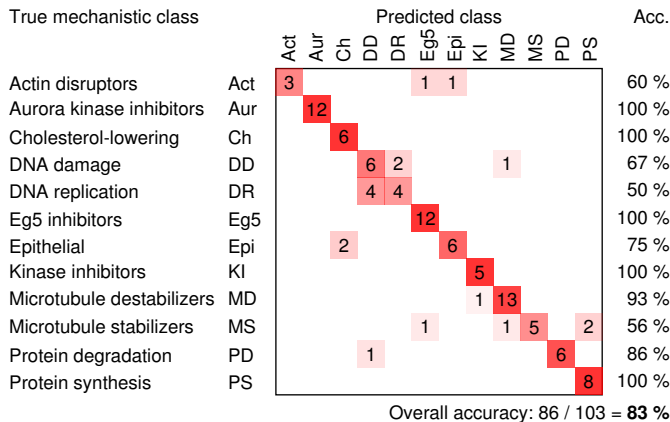

### B: KS statistics

True mechanistic class

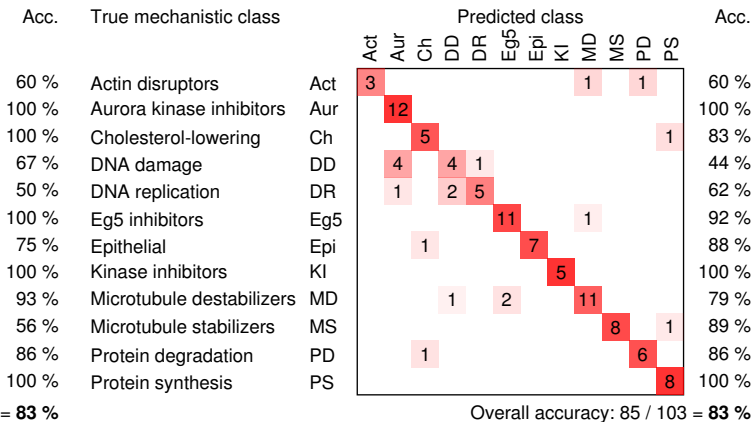

### C: SVM normal vector

True mechanistic class

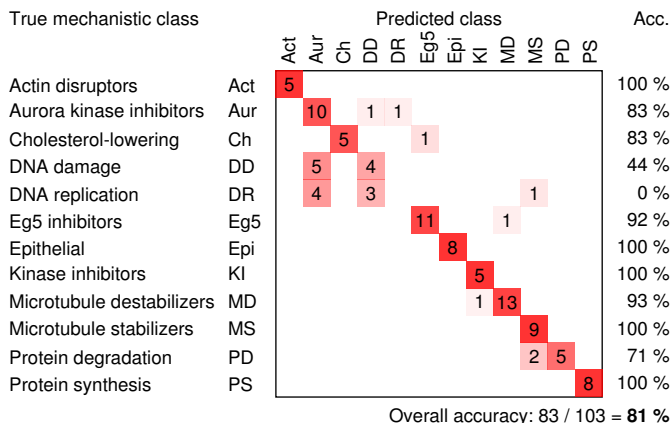

### D: SVM normal vector with recursive feature elimination

True mechanistic class

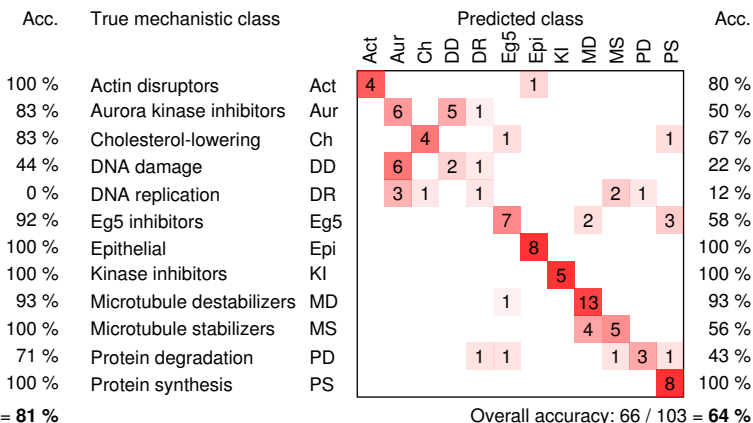

### E: Gaussian mixture (mean of 20 models)

True mechanistic class

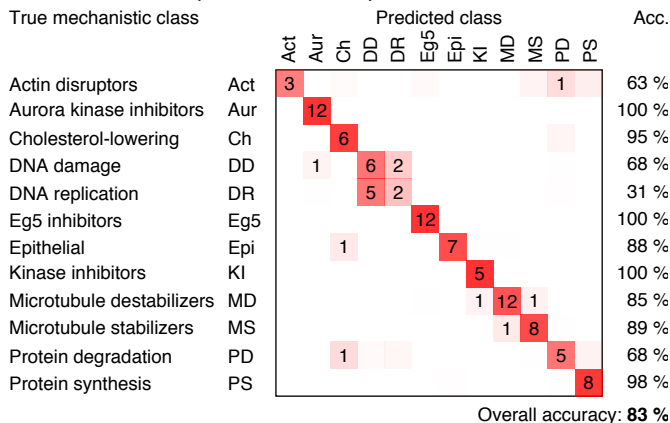

### F: Factor analysis (mean of 20 models)

True mechanistic class

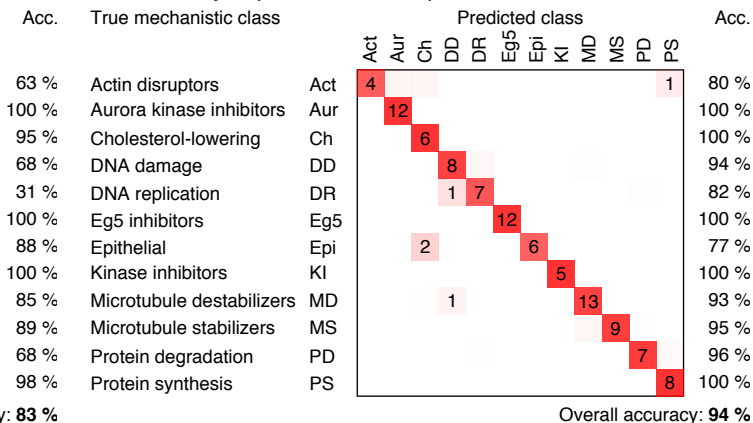

**Figure S4:** Confusion matrices for the five profiling methods, showing the number of compound-concentrations that were classified correctly (on the diagonals) and incorrectly (off the diagonals), the classification accuracies for each MOA (right columns), and overall classification accuracy (number of correctly classified compound-concentration divided by the total number of compound-concentrations). Panels E and F show average outcomes over 20 models; dimly colored squares without numbers indicate classification outcomes that occurred less than 0.5 times on average.

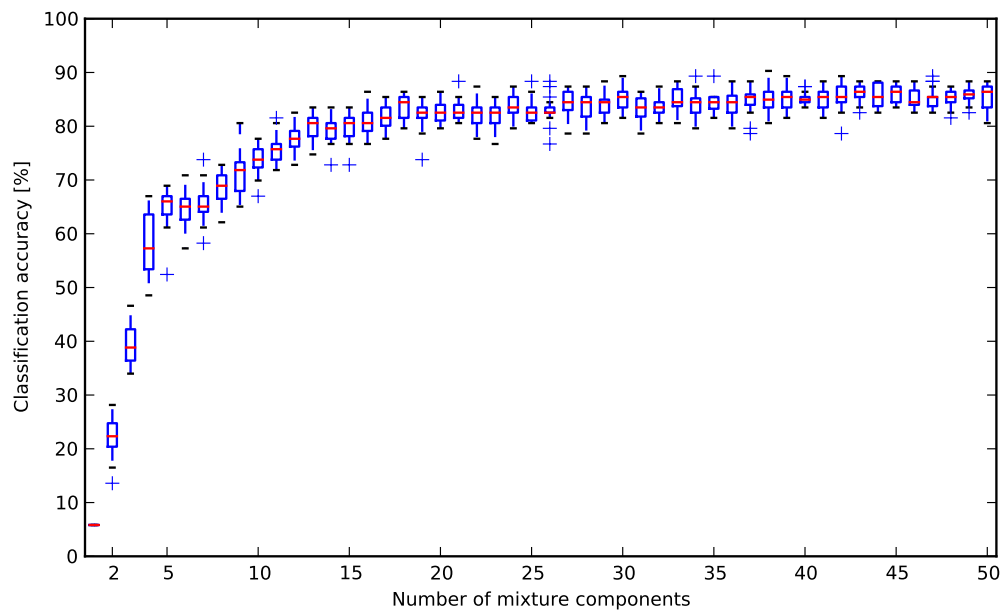

**Figure S5:** Distributions of classification accuracies for 20 runs of the Gaussian mixture method for each possible choice of the number of mixture components from 2 to 50.

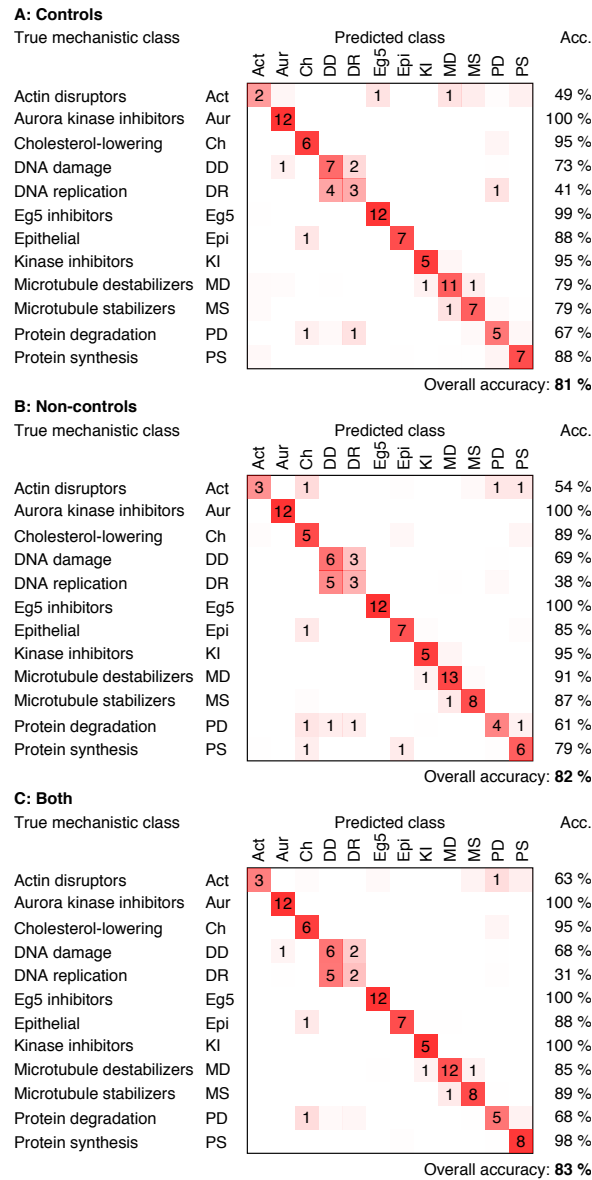

**Figure S6:** The GM method performs similarly whether the model is built from a subsample of control cells, a subsample of non-control (treated) cells, or a mixture of both.

**A: Means (mean of 20 models)**

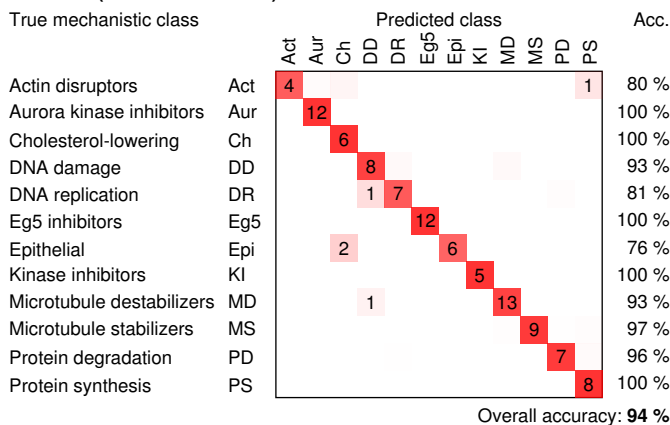

**B: KS statistics**

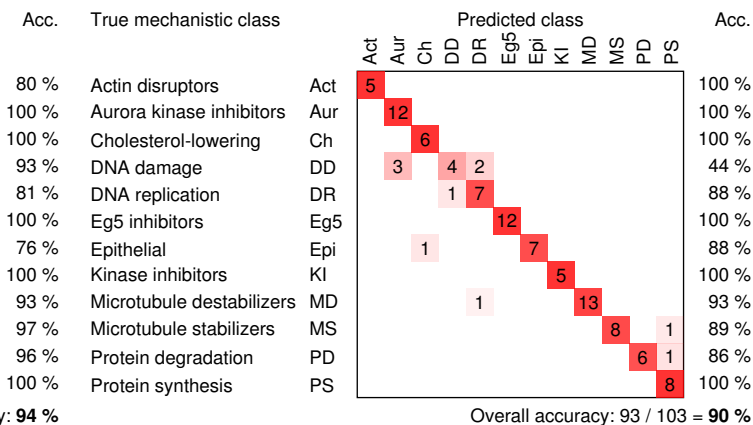

**C: SVM normal vector**

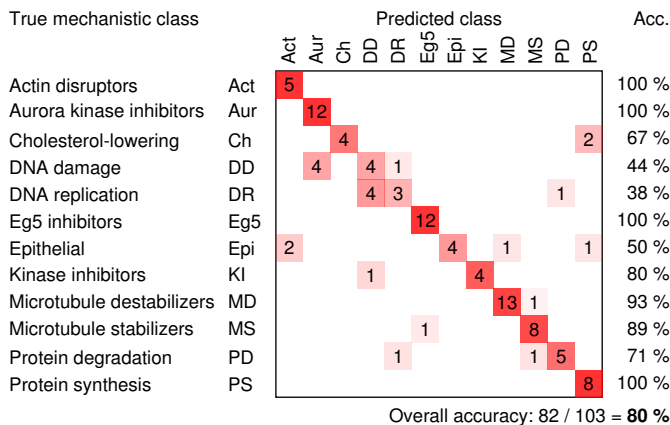

**D: Gaussian mixture**

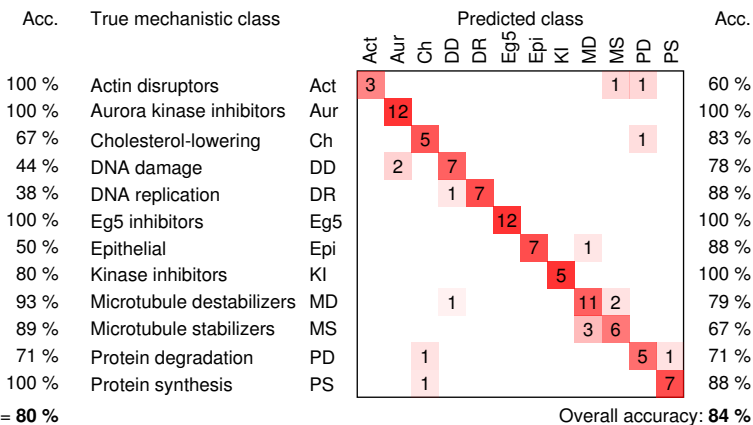

**Figure S7:** Confusion matrices for each method, using factor analysis as a preprocessing step.



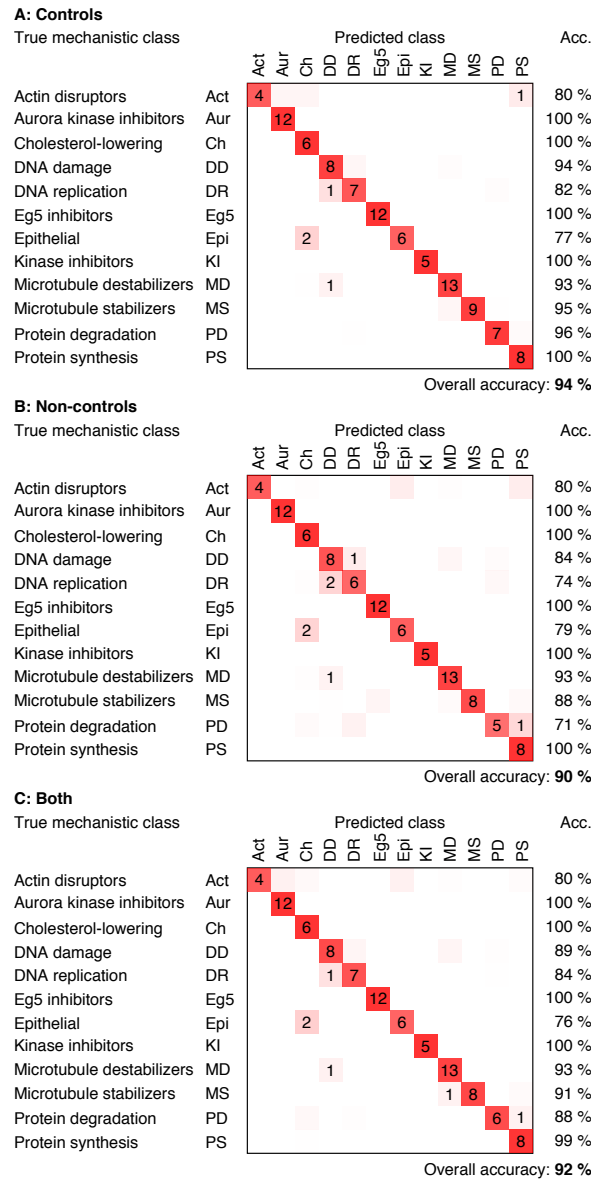

**Figure S8:** The FA method performs similarly whether the model is built from a subsample of control cells, a subsample of non-control (treated) cells, or a mixture of both.

**A: DNA-anilin-SC35**

True mechanistic class

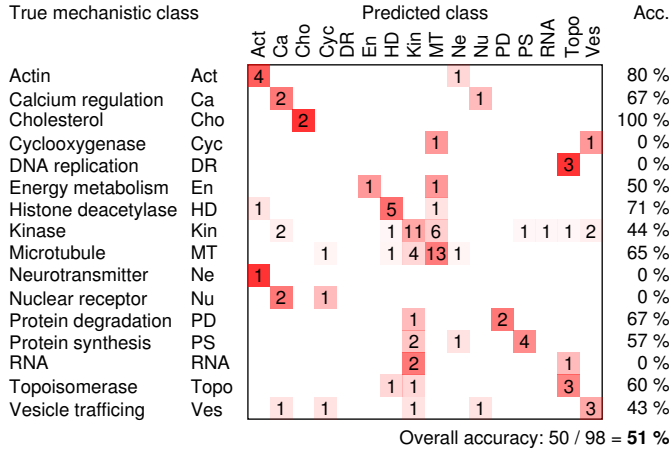

**B: DNA-p53-cFOS**

True mechanistic class

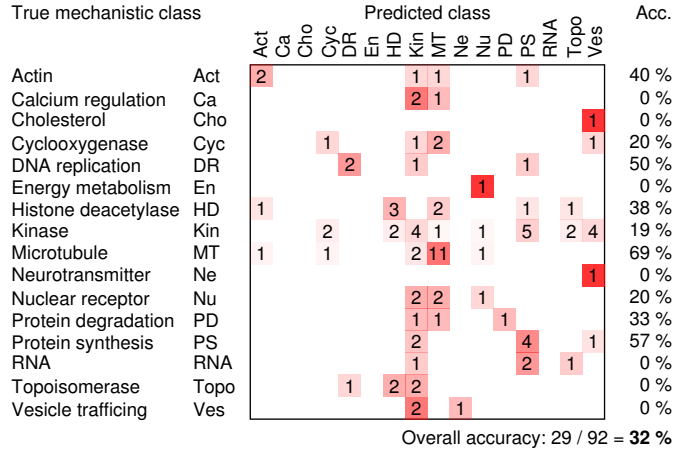

**C: DNA-MT-Actin**

True mechanistic class

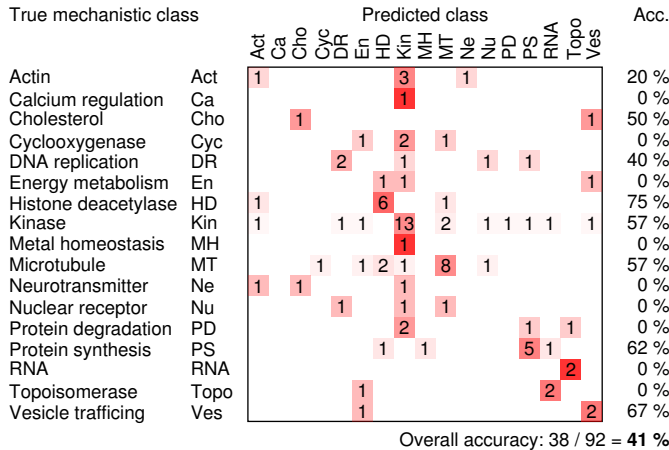

**D: DNA-pp38-pERK**

True mechanistic class

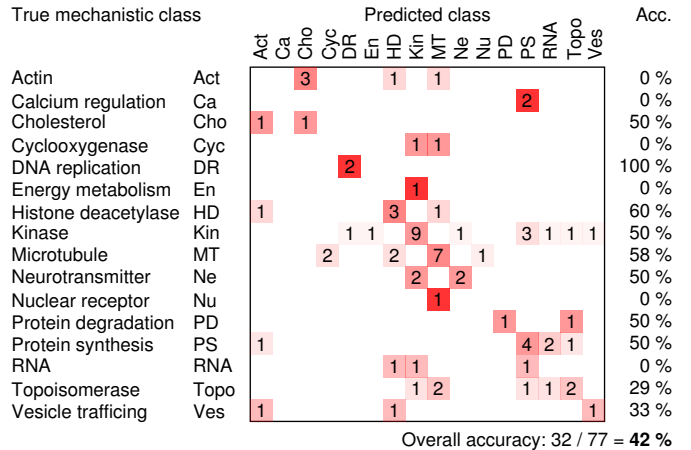

Figure S9: Confusion matrices from Loo et al.'s experiment, compiled from information in their Supplementary Data 2<sup>15</sup>

## SUPPLEMENTARY TABLES

**Table S1:** The 453 measurements made by CellProfiler for each cell. (See the CellProfiler manual for descriptions of each.)

| Image feature name                            |
|-----------------------------------------------|
| TableNumber                                   |
| ImageNumber                                   |
| ObjectNumber                                  |
| Nuclei_Children_Cells_Count                   |
| Nuclei_Children_Cytoplasm_Count               |
| Nuclei_AreaShape_Area                         |
| Nuclei_AreaShape_Eccentricity                 |
| Nuclei_AreaShape_Solidity                     |
| Nuclei_AreaShape_Extent                       |
| Nuclei_AreaShape_EulerNumber                  |
| Nuclei_AreaShape_Perimeter                    |
| Nuclei_AreaShape_FormFactor                   |
| Nuclei_AreaShape_MajorAxisLength              |
| Nuclei_AreaShape_MinorAxisLength              |
| Nuclei_AreaShape_Orientation                  |
| Nuclei_Zernike_0.0                            |
| Nuclei_Zernike_1.1                            |
| Nuclei_Zernike_2.0                            |
| Nuclei_Zernike_2.2                            |
| Nuclei_Zernike_3.1                            |
| Nuclei_Zernike_3.3                            |
| Nuclei_Zernike_4.0                            |
| Nuclei_Zernike_4.2                            |
| Nuclei_Zernike_4.4                            |
| Nuclei_Zernike_5.1                            |
| Nuclei_Zernike_5.3                            |
| Nuclei_Zernike_5.5                            |
| Nuclei_Zernike_6.0                            |
| Nuclei_Zernike_6.2                            |
| Nuclei_Zernike_6.4                            |
| Nuclei_Zernike_6.6                            |
| Nuclei_Zernike_7.1                            |
| Nuclei_Zernike_7.3                            |
| Nuclei_Zernike_7.5                            |
| Nuclei_Zernike_7.7                            |
| Nuclei_Zernike_8.0                            |
| Nuclei_Zernike_8.2                            |
| Nuclei_Zernike_8.4                            |
| Nuclei_Zernike_8.6                            |
| Nuclei_Zernike_8.8                            |
| Nuclei_Zernike_9.1                            |
| Nuclei_Zernike_9.3                            |
| Nuclei_Zernike_9.5                            |
| Nuclei_Zernike_9.7                            |
| Nuclei_Zernike_9.9                            |
| Nuclei_Intensity_IntegratedIntensity_CorrDAPI |
| Nuclei_Intensity_MeanIntensity_CorrDAPI       |
| Nuclei_Intensity_StdIntensity_CorrDAPI        |
| Nuclei_Intensity_MinIntensity_CorrDAPI        |
| Nuclei_Intensity_MaxIntensity_CorrDAPI        |

*Continues...*

**Table S1** continued

| Image feature name                                 |
|----------------------------------------------------|
| Nuclei_Intensity_IntegratedIntensityEdge_CorrDAPI  |
| Nuclei_Intensity_MeanIntensityEdge_CorrDAPI        |
| Nuclei_Intensity_StdIntensityEdge_CorrDAPI         |
| Nuclei_Intensity_MinIntensityEdge_CorrDAPI         |
| Nuclei_Intensity_MaxIntensityEdge_CorrDAPI         |
| Nuclei_Intensity_MassDisplacement_CorrDAPI         |
| Nuclei_Intensity_LowerQuartileIntensity_CorrDAPI   |
| Nuclei_Intensity_MedianIntensity_CorrDAPI          |
| Nuclei_Intensity_UpperQuartileIntensity_CorrDAPI   |
| Nuclei_Intensity_IntegratedIntensity_CorrActin     |
| Nuclei_Intensity_MeanIntensity_CorrActin           |
| Nuclei_Intensity_StdIntensity_CorrActin            |
| Nuclei_Intensity_MinIntensity_CorrActin            |
| Nuclei_Intensity_MaxIntensity_CorrActin            |
| Nuclei_Intensity_IntegratedIntensityEdge_CorrActin |
| Nuclei_Intensity_MeanIntensityEdge_CorrActin       |
| Nuclei_Intensity_StdIntensityEdge_CorrActin        |
| Nuclei_Intensity_MinIntensityEdge_CorrActin        |
| Nuclei_Intensity_MaxIntensityEdge_CorrActin        |
| Nuclei_Intensity_MassDisplacement_CorrActin        |
| Nuclei_Intensity_LowerQuartileIntensity_CorrActin  |
| Nuclei_Intensity_MedianIntensity_CorrActin         |
| Nuclei_Intensity_UpperQuartileIntensity_CorrActin  |
| Nuclei_Intensity_IntegratedIntensity_CorrTub       |
| Nuclei_Intensity_MeanIntensity_CorrTub             |
| Nuclei_Intensity_StdIntensity_CorrTub              |
| Nuclei_Intensity_MinIntensity_CorrTub              |
| Nuclei_Intensity_MaxIntensity_CorrTub              |
| Nuclei_Intensity_IntegratedIntensityEdge_CorrTub   |
| Nuclei_Intensity_MeanIntensityEdge_CorrTub         |
| Nuclei_Intensity_StdIntensityEdge_CorrTub          |
| Nuclei_Intensity_MinIntensityEdge_CorrTub          |
| Nuclei_Intensity_MaxIntensityEdge_CorrTub          |
| Nuclei_Intensity_MassDisplacement_CorrTub          |
| Nuclei_Intensity_LowerQuartileIntensity_CorrTub    |
| Nuclei_Intensity_MedianIntensity_CorrTub           |
| Nuclei_Intensity_UpperQuartileIntensity_CorrTub    |
| Nuclei_Neighbors_NumberOfNeighbors_10              |
| Nuclei_Neighbors_PercentTouching_10                |
| Nuclei_Neighbors_FirstClosestXVector_10            |
| Nuclei_Neighbors_FirstClosestYVector_10            |
| Nuclei_Neighbors_SecondClosestXVector_10           |
| Nuclei_Neighbors_SecondClosestYVector_10           |
| Nuclei_Neighbors_AngleBetweenNeighbors_10          |
| Nuclei_Neighbors_NumberOfNeighbors_20              |
| Nuclei_Neighbors_PercentTouching_20                |
| Nuclei_Neighbors_FirstClosestXVector_20            |
| Nuclei_Neighbors_FirstClosestYVector_20            |
| Nuclei_Neighbors_SecondClosestXVector_20           |
| Nuclei_Neighbors_SecondClosestYVector_20           |
| Nuclei_Neighbors_AngleBetweenNeighbors_20          |
| Nuclei_Texture_AngularSecondMoment_CorrDAPI_10     |
| Nuclei_Texture_Contrast_CorrDAPI_10                |
| Nuclei_Texture_Correlation_CorrDAPI_10             |

*Continues...*

**Table S1** continued

| Image feature name                                  |
|-----------------------------------------------------|
| Nuclei_Texture_Variance_CorrDAPI_10                 |
| Nuclei_Texture_InverseDifferenceMoment_CorrDAPI_10  |
| Nuclei_Texture_SumAverage_CorrDAPI_10               |
| Nuclei_Texture_SumVariance_CorrDAPI_10              |
| Nuclei_Texture_SumEntropy_CorrDAPI_10               |
| Nuclei_Texture_Entropy_CorrDAPI_10                  |
| Nuclei_Texture_DifferenceVariance_CorrDAPI_10       |
| Nuclei_Texture_DifferenceEntropy_CorrDAPI_10        |
| Nuclei_Texture_InfoMeas1_CorrDAPI_10                |
| Nuclei_Texture_InfoMeas2_CorrDAPI_10                |
| Nuclei_Texture_GaborX_CorrDAPI_10                   |
| Nuclei_Texture_GaborY_CorrDAPI_10                   |
| Nuclei_Texture_AngularSecondMoment_CorrActin_10     |
| Nuclei_Texture_Contrast_CorrActin_10                |
| Nuclei_Texture_Correlation_CorrActin_10             |
| Nuclei_Texture_Variance_CorrActin_10                |
| Nuclei_Texture_InverseDifferenceMoment_CorrActin_10 |
| Nuclei_Texture_SumAverage_CorrActin_10              |
| Nuclei_Texture_SumVariance_CorrActin_10             |
| Nuclei_Texture_SumEntropy_CorrActin_10              |
| Nuclei_Texture_Entropy_CorrActin_10                 |
| Nuclei_Texture_DifferenceVariance_CorrActin_10      |
| Nuclei_Texture_DifferenceEntropy_CorrActin_10       |
| Nuclei_Texture_InfoMeas1_CorrActin_10               |
| Nuclei_Texture_InfoMeas2_CorrActin_10               |
| Nuclei_Texture_GaborX_CorrActin_10                  |
| Nuclei_Texture_GaborY_CorrActin_10                  |
| Nuclei_Texture_AngularSecondMoment_CorrTub_10       |
| Nuclei_Texture_Contrast_CorrTub_10                  |
| Nuclei_Texture_Correlation_CorrTub_10               |
| Nuclei_Texture_Variance_CorrTub_10                  |
| Nuclei_Texture_InverseDifferenceMoment_CorrTub_10   |
| Nuclei_Texture_SumAverage_CorrTub_10                |
| Nuclei_Texture_SumVariance_CorrTub_10               |
| Nuclei_Texture_SumEntropy_CorrTub_10                |
| Nuclei_Texture_Entropy_CorrTub_10                   |
| Nuclei_Texture_DifferenceVariance_CorrTub_10        |
| Nuclei_Texture_DifferenceEntropy_CorrTub_10         |
| Nuclei_Texture_InfoMeas1_CorrTub_10                 |
| Nuclei_Texture_InfoMeas2_CorrTub_10                 |
| Nuclei_Texture_GaborX_CorrTub_10                    |
| Nuclei_Texture_GaborY_CorrTub_10                    |
| Nuclei_Texture_AngularSecondMoment_CorrDAPI_3       |
| Nuclei_Texture_Contrast_CorrDAPI_3                  |
| Nuclei_Texture_Correlation_CorrDAPI_3               |
| Nuclei_Texture_Variance_CorrDAPI_3                  |
| Nuclei_Texture_InverseDifferenceMoment_CorrDAPI_3   |
| Nuclei_Texture_SumAverage_CorrDAPI_3                |
| Nuclei_Texture_SumVariance_CorrDAPI_3               |
| Nuclei_Texture_SumEntropy_CorrDAPI_3                |
| Nuclei_Texture_Entropy_CorrDAPI_3                   |
| Nuclei_Texture_DifferenceVariance_CorrDAPI_3        |
| Nuclei_Texture_DifferenceEntropy_CorrDAPI_3         |
| Nuclei_Texture_InfoMeas1_CorrDAPI_3                 |

*Continues...*

**Table S1** continued

| Image feature name                                 |
|----------------------------------------------------|
| Nuclei_Texture_InfoMeas2_CorrDAPI_3                |
| Nuclei_Texture_GaborX_CorrDAPI_3                   |
| Nuclei_Texture_GaborY_CorrDAPI_3                   |
| Nuclei_Texture_AngularSecondMoment_CorrActin_3     |
| Nuclei_Texture_Contrast_CorrActin_3                |
| Nuclei_Texture_Correlation_CorrActin_3             |
| Nuclei_Texture_Variance_CorrActin_3                |
| Nuclei_Texture_InverseDifferenceMoment_CorrActin_3 |
| Nuclei_Texture_SumAverage_CorrActin_3              |
| Nuclei_Texture_SumVariance_CorrActin_3             |
| Nuclei_Texture_SumEntropy_CorrActin_3              |
| Nuclei_Texture_Entropy_CorrActin_3                 |
| Nuclei_Texture_DifferenceVariance_CorrActin_3      |
| Nuclei_Texture_DifferenceEntropy_CorrActin_3       |
| Nuclei_Texture_InfoMeas1_CorrActin_3               |
| Nuclei_Texture_InfoMeas2_CorrActin_3               |
| Nuclei_Texture_GaborX_CorrActin_3                  |
| Nuclei_Texture_GaborY_CorrActin_3                  |
| Nuclei_Texture_AngularSecondMoment_CorrTub_3       |
| Nuclei_Texture_Contrast_CorrTub_3                  |
| Nuclei_Texture_Correlation_CorrTub_3               |
| Nuclei_Texture_Variance_CorrTub_3                  |
| Nuclei_Texture_InverseDifferenceMoment_CorrTub_3   |
| Nuclei_Texture_SumAverage_CorrTub_3                |
| Nuclei_Texture_SumVariance_CorrTub_3               |
| Nuclei_Texture_SumEntropy_CorrTub_3                |
| Nuclei_Texture_Entropy_CorrTub_3                   |
| Nuclei_Texture_DifferenceVariance_CorrTub_3        |
| Nuclei_Texture_DifferenceEntropy_CorrTub_3         |
| Nuclei_Texture_InfoMeas1_CorrTub_3                 |
| Nuclei_Texture_InfoMeas2_CorrTub_3                 |
| Nuclei_Texture_GaborX_CorrTub_3                    |
| Nuclei_Texture_GaborY_CorrTub_3                    |
| Cells_Parent_Nuclei                                |
| Cells_Children_Cytoplasm_Count                     |
| Cells_AreaShape_Area                               |
| Cells_AreaShape_Eccentricity                       |
| Cells_AreaShape_Solidity                           |
| Cells_AreaShape_Extent                             |
| Cells_AreaShape_EulerNumber                        |
| Cells_AreaShape_Perimeter                          |
| Cells_AreaShape_FormFactor                         |
| Cells_AreaShape_MajorAxisLength                    |
| Cells_AreaShape_MinorAxisLength                    |
| Cells_AreaShape_Orientation                        |
| Cells_Zernike_0_0                                  |
| Cells_Zernike_1_1                                  |
| Cells_Zernike_2_0                                  |
| Cells_Zernike_2_2                                  |
| Cells_Zernike_3_1                                  |
| Cells_Zernike_3_3                                  |
| Cells_Zernike_4_0                                  |
| Cells_Zernike_4_2                                  |
| Cells_Zernike_4_4                                  |

*Continues...*

**Table S1** continued

| Image feature name                                |
|---------------------------------------------------|
| Cells_Zernike_5.1                                 |
| Cells_Zernike_5.3                                 |
| Cells_Zernike_5.5                                 |
| Cells_Zernike_6.0                                 |
| Cells_Zernike_6.2                                 |
| Cells_Zernike_6.4                                 |
| Cells_Zernike_6.6                                 |
| Cells_Zernike_7.1                                 |
| Cells_Zernike_7.3                                 |
| Cells_Zernike_7.5                                 |
| Cells_Zernike_7.7                                 |
| Cells_Zernike_8.0                                 |
| Cells_Zernike_8.2                                 |
| Cells_Zernike_8.4                                 |
| Cells_Zernike_8.6                                 |
| Cells_Zernike_8.8                                 |
| Cells_Zernike_9.1                                 |
| Cells_Zernike_9.3                                 |
| Cells_Zernike_9.5                                 |
| Cells_Zernike_9.7                                 |
| Cells_Zernike_9.9                                 |
| Cells_Intensity_IntegratedIntensity_CorrActin     |
| Cells_Intensity_MeanIntensity_CorrActin           |
| Cells_Intensity_StdIntensity_CorrActin            |
| Cells_Intensity_MinIntensity_CorrActin            |
| Cells_Intensity_MaxIntensity_CorrActin            |
| Cells_Intensity_IntegratedIntensityEdge_CorrActin |
| Cells_Intensity_MeanIntensityEdge_CorrActin       |
| Cells_Intensity_StdIntensityEdge_CorrActin        |
| Cells_Intensity_MinIntensityEdge_CorrActin        |
| Cells_Intensity_MaxIntensityEdge_CorrActin        |
| Cells_Intensity_MassDisplacement_CorrActin        |
| Cells_Intensity_LowerQuartileIntensity_CorrActin  |
| Cells_Intensity_MedianIntensity_CorrActin         |
| Cells_Intensity_UpperQuartileIntensity_CorrActin  |
| Cells_Intensity_IntegratedIntensity_CorrTub       |
| Cells_Intensity_MeanIntensity_CorrTub             |
| Cells_Intensity_StdIntensity_CorrTub              |
| Cells_Intensity_MinIntensity_CorrTub              |
| Cells_Intensity_MaxIntensity_CorrTub              |
| Cells_Intensity_IntegratedIntensityEdge_CorrTub   |
| Cells_Intensity_MeanIntensityEdge_CorrTub         |
| Cells_Intensity_StdIntensityEdge_CorrTub          |
| Cells_Intensity_MinIntensityEdge_CorrTub          |
| Cells_Intensity_MaxIntensityEdge_CorrTub          |
| Cells_Intensity_MassDisplacement_CorrTub          |
| Cells_Intensity_LowerQuartileIntensity_CorrTub    |
| Cells_Intensity_MedianIntensity_CorrTub           |
| Cells_Intensity_UpperQuartileIntensity_CorrTub    |
| Cells_Neighbors_NumberOfNeighbors_3               |
| Cells_Neighbors_PercentTouching_3                 |
| Cells_Neighbors_FirstClosestXVector_3             |
| Cells_Neighbors_FirstClosestYVector_3             |
| Cells_Neighbors_SecondClosestXVector_3            |

*Continues...*

**Table S1** continued

| Image feature name                                 |
|----------------------------------------------------|
| Cells_Neighbors_SecondClosestYVector_3             |
| Cells_Neighbors_AngleBetweenNeighbors_3            |
| Cells_Neighbors_NumberOfNeighbors_10               |
| Cells_Neighbors_PercentTouching_10                 |
| Cells_Neighbors_FirstClosestXVector_10             |
| Cells_Neighbors_FirstClosestYVector_10             |
| Cells_Neighbors_SecondClosestXVector_10            |
| Cells_Neighbors_SecondClosestYVector_10            |
| Cells_Neighbors_AngleBetweenNeighbors_10           |
| Cells_Texture_AngularSecondMoment_CorrActin_10     |
| Cells_Texture_Contrast_CorrActin_10                |
| Cells_Texture_Correlation_CorrActin_10             |
| Cells_Texture_Variance_CorrActin_10                |
| Cells_Texture_InverseDifferenceMoment_CorrActin_10 |
| Cells_Texture_SumAverage_CorrActin_10              |
| Cells_Texture_SumVariance_CorrActin_10             |
| Cells_Texture_SumEntropy_CorrActin_10              |
| Cells_Texture_Entropy_CorrActin_10                 |
| Cells_Texture_DifferenceVariance_CorrActin_10      |
| Cells_Texture_DifferenceEntropy_CorrActin_10       |
| Cells_Texture_InfoMeas1_CorrActin_10               |
| Cells_Texture_InfoMeas2_CorrActin_10               |
| Cells_Texture_GaborX_CorrActin_10                  |
| Cells_Texture_GaborY_CorrActin_10                  |
| Cells_Texture_AngularSecondMoment_CorrTub_10       |
| Cells_Texture_Contrast_CorrTub_10                  |
| Cells_Texture_Correlation_CorrTub_10               |
| Cells_Texture_Variance_CorrTub_10                  |
| Cells_Texture_InverseDifferenceMoment_CorrTub_10   |
| Cells_Texture_SumAverage_CorrTub_10                |
| Cells_Texture_SumVariance_CorrTub_10               |
| Cells_Texture_SumEntropy_CorrTub_10                |
| Cells_Texture_Entropy_CorrTub_10                   |
| Cells_Texture_DifferenceVariance_CorrTub_10        |
| Cells_Texture_DifferenceEntropy_CorrTub_10         |
| Cells_Texture_InfoMeas1_CorrTub_10                 |
| Cells_Texture_InfoMeas2_CorrTub_10                 |
| Cells_Texture_GaborX_CorrTub_10                    |
| Cells_Texture_GaborY_CorrTub_10                    |
| Cells_Texture_AngularSecondMoment_CorrActin_3      |
| Cells_Texture_Contrast_CorrActin_3                 |
| Cells_Texture_Correlation_CorrActin_3              |
| Cells_Texture_Variance_CorrActin_3                 |
| Cells_Texture_InverseDifferenceMoment_CorrActin_3  |
| Cells_Texture_SumAverage_CorrActin_3               |
| Cells_Texture_SumVariance_CorrActin_3              |
| Cells_Texture_SumEntropy_CorrActin_3               |
| Cells_Texture_Entropy_CorrActin_3                  |
| Cells_Texture_DifferenceVariance_CorrActin_3       |
| Cells_Texture_DifferenceEntropy_CorrActin_3        |
| Cells_Texture_InfoMeas1_CorrActin_3                |
| Cells_Texture_InfoMeas2_CorrActin_3                |
| Cells_Texture_GaborX_CorrActin_3                   |
| Cells_Texture_GaborY_CorrActin_3                   |

*Continues...*

**Table S1** continued

| Image feature name                              |
|-------------------------------------------------|
| Cells_Texture_AngularSecondMoment_CorrTub_3     |
| Cells_Texture_Contrast_CorrTub_3                |
| Cells_Texture_Correlation_CorrTub_3             |
| Cells_Texture_Variance_CorrTub_3                |
| Cells_Texture_InverseDifferenceMoment_CorrTub_3 |
| Cells_Texture_SumAverage_CorrTub_3              |
| Cells_Texture_SumVariance_CorrTub_3             |
| Cells_Texture_SumEntropy_CorrTub_3              |
| Cells_Texture_Entropy_CorrTub_3                 |
| Cells_Texture_DifferenceVariance_CorrTub_3      |
| Cells_Texture_DifferenceEntropy_CorrTub_3       |
| Cells_Texture_InfoMeas1_CorrTub_3               |
| Cells_Texture_InfoMeas2_CorrTub_3               |
| Cells_Texture_GaborX_CorrTub_3                  |
| Cells_Texture_GaborY_CorrTub_3                  |
| Cytoplasm_Parent_Cells                          |
| Cytoplasm_Parent_Nuclei                         |
| Cytoplasm_AreaShape_Area                        |
| Cytoplasm_AreaShape_Eccentricity                |
| Cytoplasm_AreaShape_Solidity                    |
| Cytoplasm_AreaShape_Extent                      |
| Cytoplasm_AreaShape_EulerNumber                 |
| Cytoplasm_AreaShape_Perimeter                   |
| Cytoplasm_AreaShape_FormFactor                  |
| Cytoplasm_AreaShape_MajorAxisLength             |
| Cytoplasm_AreaShape_MinorAxisLength             |
| Cytoplasm_AreaShape_Orientation                 |
| Cytoplasm_Zernike_0_0                           |
| Cytoplasm_Zernike_1_1                           |
| Cytoplasm_Zernike_2_0                           |
| Cytoplasm_Zernike_2_2                           |
| Cytoplasm_Zernike_3_1                           |
| Cytoplasm_Zernike_3_3                           |
| Cytoplasm_Zernike_4_0                           |
| Cytoplasm_Zernike_4_2                           |
| Cytoplasm_Zernike_4_4                           |
| Cytoplasm_Zernike_5_1                           |
| Cytoplasm_Zernike_5_3                           |
| Cytoplasm_Zernike_5_5                           |
| Cytoplasm_Zernike_6_0                           |
| Cytoplasm_Zernike_6_2                           |
| Cytoplasm_Zernike_6_4                           |
| Cytoplasm_Zernike_6_6                           |
| Cytoplasm_Zernike_7_1                           |
| Cytoplasm_Zernike_7_3                           |
| Cytoplasm_Zernike_7_5                           |
| Cytoplasm_Zernike_7_7                           |
| Cytoplasm_Zernike_8_0                           |
| Cytoplasm_Zernike_8_2                           |
| Cytoplasm_Zernike_8_4                           |
| Cytoplasm_Zernike_8_6                           |
| Cytoplasm_Zernike_8_8                           |
| Cytoplasm_Zernike_9_1                           |
| Cytoplasm_Zernike_9_3                           |

*Continues...*

**Table S1** continued

| Image feature name                                     |
|--------------------------------------------------------|
| Cytoplasm_Zernike_9_5                                  |
| Cytoplasm_Zernike_9_7                                  |
| Cytoplasm_Zernike_9_9                                  |
| Cytoplasm_Intensity_IntegratedIntensity_CorrActin      |
| Cytoplasm_Intensity_MeanIntensity_CorrActin            |
| Cytoplasm_Intensity_StdIntensity_CorrActin             |
| Cytoplasm_Intensity_MinIntensity_CorrActin             |
| Cytoplasm_Intensity_MaxIntensity_CorrActin             |
| Cytoplasm_Intensity_IntegratedIntensityEdge_CorrActin  |
| Cytoplasm_Intensity_MeanIntensityEdge_CorrActin        |
| Cytoplasm_Intensity_StdIntensityEdge_CorrActin         |
| Cytoplasm_Intensity_MinIntensityEdge_CorrActin         |
| Cytoplasm_Intensity_MaxIntensityEdge_CorrActin         |
| Cytoplasm_Intensity_MassDisplacement_CorrActin         |
| Cytoplasm_Intensity_LowerQuartileIntensity_CorrActin   |
| Cytoplasm_Intensity_MedianIntensity_CorrActin          |
| Cytoplasm_Intensity_UpperQuartileIntensity_CorrActin   |
| Cytoplasm_Intensity_IntegratedIntensity_CorrTub        |
| Cytoplasm_Intensity_MeanIntensity_CorrTub              |
| Cytoplasm_Intensity_StdIntensity_CorrTub               |
| Cytoplasm_Intensity_MinIntensity_CorrTub               |
| Cytoplasm_Intensity_MaxIntensity_CorrTub               |
| Cytoplasm_Intensity_IntegratedIntensityEdge_CorrTub    |
| Cytoplasm_Intensity_MeanIntensityEdge_CorrTub          |
| Cytoplasm_Intensity_StdIntensityEdge_CorrTub           |
| Cytoplasm_Intensity_MinIntensityEdge_CorrTub           |
| Cytoplasm_Intensity_MaxIntensityEdge_CorrTub           |
| Cytoplasm_Intensity_MassDisplacement_CorrTub           |
| Cytoplasm_Intensity_LowerQuartileIntensity_CorrTub     |
| Cytoplasm_Intensity_MedianIntensity_CorrTub            |
| Cytoplasm_Intensity_UpperQuartileIntensity_CorrTub     |
| Cytoplasm_Texture_AngularSecondMoment_CorrActin_10     |
| Cytoplasm_Texture_Contrast_CorrActin_10                |
| Cytoplasm_Texture_Correlation_CorrActin_10             |
| Cytoplasm_Texture_Variance_CorrActin_10                |
| Cytoplasm_Texture_InverseDifferenceMoment_CorrActin_10 |
| Cytoplasm_Texture_SumAverage_CorrActin_10              |
| Cytoplasm_Texture_SumVariance_CorrActin_10             |
| Cytoplasm_Texture_SumEntropy_CorrActin_10              |
| Cytoplasm_Texture_Entropy_CorrActin_10                 |
| Cytoplasm_Texture_DifferenceVariance_CorrActin_10      |
| Cytoplasm_Texture_DifferenceEntropy_CorrActin_10       |
| Cytoplasm_Texture_InfoMeas1_CorrActin_10               |
| Cytoplasm_Texture_InfoMeas2_CorrActin_10               |
| Cytoplasm_Texture_GaborX_CorrActin_10                  |
| Cytoplasm_Texture_GaborY_CorrActin_10                  |
| Cytoplasm_Texture_AngularSecondMoment_CorrTub_10       |
| Cytoplasm_Texture_Contrast_CorrTub_10                  |
| Cytoplasm_Texture_Correlation_CorrTub_10               |
| Cytoplasm_Texture_Variance_CorrTub_10                  |
| Cytoplasm_Texture_InverseDifferenceMoment_CorrTub_10   |
| Cytoplasm_Texture_SumAverage_CorrTub_10                |
| Cytoplasm_Texture_SumVariance_CorrTub_10               |
| Cytoplasm_Texture_SumEntropy_CorrTub_10                |

*Continues...*

**Table S1** continued

---

| Image feature name                                    |
|-------------------------------------------------------|
| Cytoplasm.Texture.Entropy.CorrTub.10                  |
| Cytoplasm.Texture.DifferenceVariance.CorrTub.10       |
| Cytoplasm.Texture.DifferenceEntropy.CorrTub.10        |
| Cytoplasm.Texture.InfoMeas1.CorrTub.10                |
| Cytoplasm.Texture.InfoMeas2.CorrTub.10                |
| Cytoplasm.Texture.GaborX.CorrTub.10                   |
| Cytoplasm.Texture.GaborY.CorrTub.10                   |
| Cytoplasm.Texture.AngularSecondMoment.CorrActin.3     |
| Cytoplasm.Texture.Contrast.CorrActin.3                |
| Cytoplasm.Texture.Correlation.CorrActin.3             |
| Cytoplasm.Texture.Variance.CorrActin.3                |
| Cytoplasm.Texture.InverseDifferenceMoment.CorrActin.3 |
| Cytoplasm.Texture.SumAverage.CorrActin.3              |
| Cytoplasm.Texture.SumVariance.CorrActin.3             |
| Cytoplasm.Texture.SumEntropy.CorrActin.3              |
| Cytoplasm.Texture.Entropy.CorrActin.3                 |
| Cytoplasm.Texture.DifferenceVariance.CorrActin.3      |
| Cytoplasm.Texture.DifferenceEntropy.CorrActin.3       |
| Cytoplasm.Texture.InfoMeas1.CorrActin.3               |
| Cytoplasm.Texture.InfoMeas2.CorrActin.3               |
| Cytoplasm.Texture.GaborX.CorrActin.3                  |
| Cytoplasm.Texture.GaborY.CorrActin.3                  |
| Cytoplasm.Texture.AngularSecondMoment.CorrTub.3       |
| Cytoplasm.Texture.Contrast.CorrTub.3                  |
| Cytoplasm.Texture.Correlation.CorrTub.3               |
| Cytoplasm.Texture.Variance.CorrTub.3                  |
| Cytoplasm.Texture.InverseDifferenceMoment.CorrTub.3   |
| Cytoplasm.Texture.SumAverage.CorrTub.3                |
| Cytoplasm.Texture.SumVariance.CorrTub.3               |
| Cytoplasm.Texture.SumEntropy.CorrTub.3                |
| Cytoplasm.Texture.Entropy.CorrTub.3                   |
| Cytoplasm.Texture.DifferenceVariance.CorrTub.3        |
| Cytoplasm.Texture.DifferenceEntropy.CorrTub.3         |
| Cytoplasm.Texture.InfoMeas1.CorrTub.3                 |
| Cytoplasm.Texture.InfoMeas2.CorrTub.3                 |
| Cytoplasm.Texture.GaborX.CorrTub.3                    |
| Cytoplasm.Texture.GaborY.CorrTub.3                    |

---

**Table S2:** The ground-truth set used for comparing profiling algorithms

| Mechanism of action       | Compound               | Concentrations [ $\mu\text{M}$ ]        |
|---------------------------|------------------------|-----------------------------------------|
| Actin disruptors          | cytochalasin B         | 10.0, 30.0                              |
|                           | cytochalasin D         | 0.3                                     |
|                           | latrunculin B          | 1.0, 3.0                                |
| Aurora kinase inhibitors  | AZ-A                   | 0.1, 0.3, 1.0, 3.0, 10.0, 30.0          |
|                           | AZ258                  | 0.1, 0.3, 1.0                           |
|                           | AZ841                  | 0.1, 0.3, 1.0                           |
| Cholesterol-lowering      | mevinolin/lovastatin   | 1.5, 5.0, 15.0                          |
|                           | simvastatin            | 2.0, 6.0, 20.0                          |
| DNA damage                | chlorambucil           | 10.0                                    |
|                           | cisplatin              | 10.0                                    |
|                           | etoposide              | 1.0, 3.0, 10.0                          |
|                           | mitomycin C            | 0.1, 0.3, 1.0, 3.0                      |
| DNA replication           | camptothecin           | 0.003, 0.01, 0.03                       |
|                           | floxuridine            | 10.0, 30.0                              |
|                           | methotrexate           | 10.0                                    |
|                           | mitoxantrone           | 0.003, 0.01                             |
| Eg5 inhibitors            | AZ-C                   | 0.001, 0.003, 0.01, 0.03, 0.1, 0.3, 1.0 |
|                           | AZ138                  | 0.03, 0.1, 0.3, 1.0, 3.0                |
| Epithelial                | AZ-J                   | 1.0, 3.0, 10.0                          |
|                           | AZ-U                   | 1.0, 3.0, 10.0                          |
|                           | PP-2                   | 3.0, 10.0                               |
| Kinase inhibitors         | PD-169316              | 3.0, 10.0                               |
|                           | alsterpaullone         | 1.0, 3.0                                |
|                           | bryostatin             | 0.3                                     |
| Microtubule destabilizers | colchicine             | 0.03                                    |
|                           | demecolcine            | 0.3, 1.0, 3.0, 10.0                     |
|                           | nocodazole             | 1.0, 3.0                                |
|                           | vincristine            | 0.003, 0.01, 0.03, 0.1, 0.3, 1.0, 3.0   |
| Microtubule stabilizers   | docetaxel              | 0.03, 0.1, 0.3                          |
|                           | epothilone B           | 0.1, 0.3, 1.0                           |
|                           | taxol                  | 0.3, 1.0, 3.0                           |
| Protein degradation       | ALLN                   | 3.0, 100.0                              |
|                           | MG-132                 | 0.1, 3.0                                |
|                           | lactacystin            | 10.0                                    |
|                           | proteasome inhibitor I | 0.1, 3.0                                |
| Protein synthesis         | anisomycin             | 0.3, 1.0                                |
|                           | cyclohexamide          | 5.0, 15.0, 50.0                         |
|                           | emetine                | 0.1, 0.3, 1.0                           |



**Table S3:** The compounds and concentrations with which cells were treated

| Compound name         | Concentrations [ $\mu\text{M}$ ]                                                         | Structure                                                                             |
|-----------------------|------------------------------------------------------------------------------------------|---------------------------------------------------------------------------------------|
| 3,3'-diaminobenzidine | 0.003, 0.01, 0.03, 0.1, 0.3, 1.0, 3.0, 10.0, 30.0                                        | 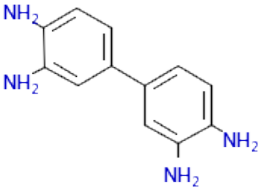   |
| 5-fluorouracil        | 0.003, 0.01, 0.03, 0.1, 0.3, 1.0, 3.0, 10.0                                              |    |
| AG-1478               | 0.003, 0.006, 0.01, 0.02, 0.03, 0.06, 0.1, 0.2, 0.3, 0.6, 1.0, 2.0, 3.0, 6.0, 10.0, 20.0 |  |
| ALLN                  | 0.03, 0.1, 0.3, 1.0, 3.0, 10.0, 30.0, 100.0, 10000.0                                     |  |
| AZ-A                  | 0.01, 0.03, 0.1, 0.3, 1.0, 3.0, 10.0, 30.0                                               | (not disclosed)                                                                       |
| AZ-B                  | 0.01, 0.03, 0.1, 0.3, 1.0, 3.0, 10.0, 30.0                                               | (not disclosed)                                                                       |
| AZ-C                  | 0.0003, 0.001, 0.003, 0.01, 0.03, 0.1, 0.3, 1.0                                          | (not disclosed)                                                                       |

*Continues on the next page*

Table S3: continued from the previous page

| Compound name | Concentrations [ $\mu\text{M}$ ]            | Structure       |
|---------------|---------------------------------------------|-----------------|
| AZ-D (AZ841)  | 0.01, 0.03, 0.1, 0.3, 1.0, 3.0, 10.0, 30.0  | <p>Chiral</p>   |
| AZ-E (AZ258)  | 0.01, 0.03, 0.1, 0.3, 1.0, 3.0, 10.0, 30.0  | <p>Chiral</p>   |
| AZ-F (AZ701)  | 0.01, 0.03, 0.1, 0.3, 1.0, 3.0, 10.0, 30.0  |                 |
| AZ-G (AZ235)  | 0.01, 0.03, 0.1, 0.3, 1.0, 3.0, 10.0, 30.0  |                 |
| AZ-H          | 0.01, 0.03, 0.1, 0.3, 1.0, 3.0, 10.0, 30.0  | (not disclosed) |
| AZ-I          | 0.01, 0.03, 0.1, 0.3, 1.0, 3.0, 10.0, 30.0  | (not disclosed) |
| AZ-J          | 0.003, 0.01, 0.03, 0.1, 0.3, 1.0, 3.0, 10.0 | (not disclosed) |
| AZ-K          | 0.003, 0.01, 0.03, 0.1, 0.3, 1.0, 3.0, 10.0 | (not disclosed) |
| AZ-L          | 0.01, 0.03, 0.1, 0.3, 1.0, 3.0, 10.0, 30.0  | (not disclosed) |
| AZ-M          | 0.01, 0.03, 0.1, 0.3, 1.0, 3.0, 10.0, 30.0  | (not disclosed) |

Continues on the next page

**Table S3:** continued from the previous page

| Compound name             | Concentrations [ $\mu\text{M}$ ]            | Structure                                                                                                                     |
|---------------------------|---------------------------------------------|-------------------------------------------------------------------------------------------------------------------------------|
| AZ-N                      | 0.003, 0.01, 0.03, 0.1, 0.3, 1.0, 3.0, 10.0 | (not disclosed)                                                                                                               |
| AZ-O                      | 0.01, 0.03, 0.1, 0.3, 1.0, 3.0, 10.0, 30.0  | (not disclosed)                                                                                                               |
| AZ-P (AZ970)              | 0.01, 0.03, 0.1, 0.3, 1.0, 3.0, 10.0, 30.0  | 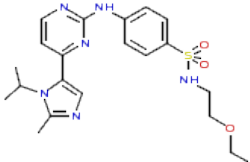                                           |
| AZ-Q (AZ138)              | 0.01, 0.03, 0.1, 0.3, 1.0, 3.0, 10.0, 30.0  |  <p style="text-align: right;">Chiral</p> |
| AZ-U                      | 0.01, 0.03, 0.1, 0.3, 1.0, 3.0, 10.0, 30.0  | (not disclosed)                                                                                                               |
| Cdk1 inhibitor III        | 0.003, 0.01, 0.03, 0.1, 0.3, 1.0, 3.0, 10.0 |                                          |
| Cdk1/2 inhibitor (NU6102) | 0.003, 0.01, 0.03, 0.1, 0.3, 1.0, 3.0, 10.0 |                                          |

Continues on the next page

Table S3: continued from the previous page

| Compound name | Concentrations [ $\mu\text{M}$ ]                | Structure                                                                                                                      |
|---------------|-------------------------------------------------|--------------------------------------------------------------------------------------------------------------------------------|
| H-7           | 0.015, 0.05, 0.15, 0.5, 1.5, 5.0, 15.0, 50.0    | 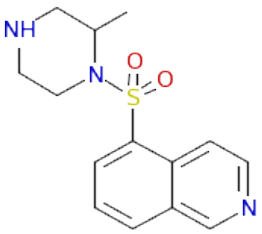 <p style="text-align: right;">Chiral</p>   |
| ICI-182,780   | 0.01, 0.03, 0.1, 0.3, 1.0, 3.0, 10.0, 30.0      |                                             |
| LY-294002     | 0.0006, 0.002, 0.006, 0.02, 0.06, 0.2, 0.6, 2.0 |  <p style="text-align: right;">Chiral</p> |
| MG-132        | 0.03, 0.1, 0.3, 1.0, 3.0, 10.0, 30.0, 100.0     |                                           |

Continues on the next page

Table S3: continued from the previous page

| Compound name | Concentrations [ $\mu\text{M}$ ]                  | Structure                                                                             |
|---------------|---------------------------------------------------|---------------------------------------------------------------------------------------|
| PD-150606     | 0.015, 0.05, 0.15, 0.5, 1.5, 5.0, 15.0, 50.0      | 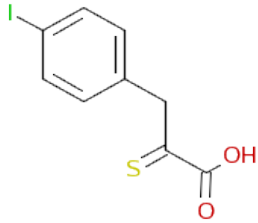   |
| PD-169316     | 0.01, 0.03, 0.1, 0.3, 1.0, 3.0, 10.0, 30.0        |    |
| PD-98059      | 0.01, 0.03, 0.1, 0.3, 1.0, 3.0, 10.0, 30.0        |  |
| PP-2          | 0.003, 0.01, 0.03, 0.1, 0.3, 1.0, 3.0, 10.0, 30.0 |  |

Continues on the next page

Table S3: continued from the previous page

| Compound name | Concentrations [ $\mu\text{M}$ ]                                                         | Structure                                                                             |
|---------------|------------------------------------------------------------------------------------------|---------------------------------------------------------------------------------------|
| SB-202190     | 0.006, 0.02, 0.06, 0.2, 0.6, 2.0, 6.0, 20.0                                              | 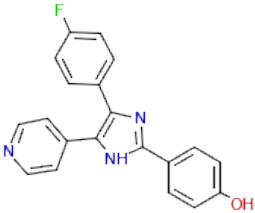   |
| SB-203580     | 0.003, 0.006, 0.01, 0.02, 0.03, 0.06, 0.1, 0.2, 0.3, 0.6, 1.0, 2.0, 3.0, 6.0, 10.0, 20.0 |    |
| SP-600125     | 0.015, 0.05, 0.15, 0.5, 1.5, 5.0, 15.0, 50.0, 10000.0                                    |  |
| TKK           | 0.003, 0.01, 0.03, 0.1, 0.3, 1.0, 3.0, 10.0                                              | (not disclosed)                                                                       |
| UNKNOWN       | 0.003, 0.01, 0.03, 0.1, 0.3, 1.0, 3.0, 10.0                                              | (not disclosed)                                                                       |
| UO-126        | 0.01, 0.03, 0.1, 0.3, 1.0, 3.0, 10.0, 30.0                                               |  |

Continues on the next page

Table S3: continued from the previous page

| Compound name             | Concentrations [ $\mu\text{M}$ ]                | Structure                                                                             |
|---------------------------|-------------------------------------------------|---------------------------------------------------------------------------------------|
|                           |                                                 | Chiral                                                                                |
| Y-27632                   | 0.01, 0.03, 0.1, 0.3, 1.0, 3.0, 10.0, 30.0      | 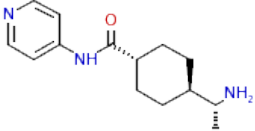   |
| acyclovir                 | 0.0015, 0.005, 0.015, 0.05, 0.15, 0.5, 1.5, 5.0 |    |
| adenine arabinofuranoside | 0.01, 0.03, 0.1, 0.3, 1.0, 3.0, 10.0, 30.0      | (not disclosed)                                                                       |
| aloisine A                | 0.01, 0.03, 0.1, 0.3, 1.0, 3.0, 10.0, 30.0      |  |
| alsterpaullone            | 0.01, 0.03, 0.1, 0.3, 1.0, 3.0, 10.0, 30.0      |  |

Continues on the next page

**Table S3:** *continued from the previous page*

| Compound name            | Concentrations [ $\mu\text{M}$ ]                | Structure                                                                             |
|--------------------------|-------------------------------------------------|---------------------------------------------------------------------------------------|
|                          |                                                 | Chiral                                                                                |
| anisomycin               | 0.003, 0.01, 0.03, 0.1, 0.3, 1.0, 3.0, 10.0     | 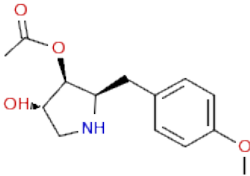   |
| aphidicolin              | 0.003, 0.01, 0.03, 0.1, 0.3, 1.0, 3.0, 10.0     |    |
| arabinofuranosylcytosine | 0.01, 0.03, 0.1, 0.3, 1.0, 3.0, 10.0, 30.0      |  |
| atropine                 | 0.0015, 0.005, 0.015, 0.05, 0.15, 0.5, 1.5, 5.0 |  |

*Continues on the next page*



Table S3: continued from the previous page

| Compound name | Concentrations [ $\mu\text{M}$ ]                                                                  | Structure                                                                             |
|---------------|---------------------------------------------------------------------------------------------------|---------------------------------------------------------------------------------------|
|               |                                                                                                   | Chiral                                                                                |
| bleomycin     | 0.015, 0.05, 0.15, 0.5, 1.5, 5.0, 15.0, 50.0, 10000.0                                             | 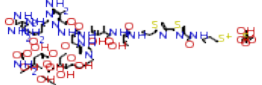   |
| boheminine    | 0.003, 0.006, 0.01, 0.02, 0.03, 0.06, 0.1, 0.2, 0.3, 0.6, 1.0, 2.0, 3.0, 6.0, 10.0, 20.0          |    |
|               |                                                                                                   | Chiral                                                                                |
| brefeldin A   | 0.003, 0.01, 0.03, 0.1, 0.3, 1.0, 3.0, 10.0                                                       |  |
|               |                                                                                                   | Chiral                                                                                |
| bryostatins   | 6e-05, 0.0002, 0.0006, 0.002, 0.003, 0.006, 0.01, 0.02, 0.03, 0.06, 0.1, 0.2, 0.3, 1.0, 3.0, 10.0 |  |

Continues on the next page

Table S3: continued from the previous page

| Compound name              | Concentrations [ $\mu\text{M}$ ]                                                             | Structure                                                                                     |
|----------------------------|----------------------------------------------------------------------------------------------|-----------------------------------------------------------------------------------------------|
| calpain inhibitor 2 (ALLM) | 0.015, 0.05, 0.15, 0.5, 1.5, 5.0, 15.0, 50.0                                                 | 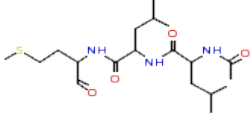           |
| calpeptin                  | 0.006, 0.015, 0.02, 0.05, 0.06, 0.15, 0.2, 0.5, 0.6, 1.5, 2.0, 5.0, 6.0, 15.0, 20.0, 50.0    | <br>Chiral |
| camptothecin               | 0.0015, 0.003, 0.005, 0.01, 0.015, 0.03, 0.05, 0.1, 0.15, 0.3, 0.5, 1.0, 1.5, 3.0, 5.0, 10.0 |          |
| carboplatin                | 0.006, 0.02, 0.06, 0.2, 0.6, 2.0, 6.0, 20.0                                                  |          |

Continues on the next page

Table S3: continued from the previous page

| Compound name              | Concentrations [ $\mu\text{M}$ ]             | Structure |
|----------------------------|----------------------------------------------|-----------|
| caspace inhibitor 1 (ZVAD) | 0.015, 0.05, 0.15, 0.5, 1.5, 5.0, 15.0, 50.0 |           |
| cathepsin inhibitor I      | 0.003, 0.01, 0.03, 0.1, 0.3, 1.0, 3.0, 10.0  |           |
| chlorambucil               | 0.003, 0.01, 0.03, 0.1, 0.3, 1.0, 3.0, 10.0  |           |
| chloramphenicol            | 0.006, 0.02, 0.06, 0.2, 0.6, 2.0, 6.0, 20.0  |           |

Chiral

Continues on the next page

**Table S3:** continued from the previous page

| Compound name    | Concentrations [ $\mu\text{M}$ ]                                                             | Structure                                                                                                                     |
|------------------|----------------------------------------------------------------------------------------------|-------------------------------------------------------------------------------------------------------------------------------|
| cisplatin        | 0.01, 0.03, 0.1, 0.3, 1.0, 3.0, 10.0, 30.0                                                   | 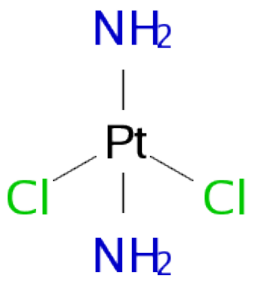 <p style="text-align: center;">Chiral</p> |
| colchicine       | 1e-05, 3e-05, 0.0001, 0.0003, 0.001, 0.003, 0.01, 0.03, 0.1, 0.3, 1.0, 3.0                   |                                            |
| cyclohexamide    | 0.015, 0.05, 0.15, 0.5, 1.5, 5.0, 15.0, 50.0                                                 |                                          |
| cyclophosphamide | 0.0015, 0.003, 0.005, 0.01, 0.015, 0.03, 0.05, 0.1, 0.15, 0.3, 0.5, 1.0, 1.5, 3.0, 5.0, 10.0 |                                          |

*Continues on the next page*

Table S3: continued from the previous page

| Compound name       | Concentrations [ $\mu\text{M}$ ]                     | Structure                                                                             |
|---------------------|------------------------------------------------------|---------------------------------------------------------------------------------------|
|                     |                                                      | Chiral                                                                                |
| cytochalasin B      | 0.01, 0.03, 0.1, 0.3, 1.0, 3.0, 10.0, 30.0           | 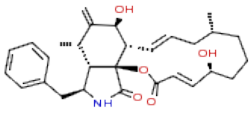   |
|                     |                                                      | Chiral                                                                                |
| cytochalasin D      | 0.003, 0.01, 0.03, 0.1, 0.3, 1.0, 3.0, 10.0, 10000.0 |    |
| demecolcine         | 0.003, 0.01, 0.03, 0.1, 0.3, 1.0, 3.0, 10.0          |  |
|                     |                                                      | Chiral                                                                                |
| deoxymannojirimycin | 0.3, 1.0, 3.0, 10.0, 30.0, 100.0, 300.0, 1000.0      |  |

Continues on the next page

Table S3: continued from the previous page

| Compound name    | Concentrations [ $\mu\text{M}$ ]                           | Structure                                                                                           |
|------------------|------------------------------------------------------------|-----------------------------------------------------------------------------------------------------|
| deoxynojirimycin | 0.3, 1.0, 3.0, 10.0, 30.0, 100.0, 300.0, 1000.0            | <p>Chiral</p> 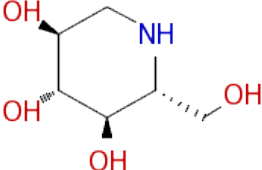   |
| docetaxel        | 0.0003, 0.001, 0.003, 0.01, 0.03, 0.1, 0.3, 1.0            | <p>Chiral</p>    |
| doxorubicin      | 0.0003, 0.001, 0.003, 0.01, 0.03, 0.1, 0.3, 1.0, 3.0, 10.0 | <p>Chiral</p>  |
| emetine          | 0.01, 0.03, 0.1, 0.3, 1.0, 3.0, 10.0, 30.0                 |                |

Continues on the next page

Table S3: continued from the previous page

| Compound name | Concentrations [ $\mu\text{M}$ ]                                    | Structure                                                                                           |
|---------------|---------------------------------------------------------------------|-----------------------------------------------------------------------------------------------------|
| epothilone B  | 3e-05, 0.0001, 0.0003, 0.001, 0.003, 0.01, 0.03, 0.1, 0.3, 1.0, 3.0 | <p>Chiral</p> 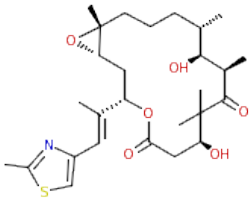   |
| etoposide     | 0.01, 0.03, 0.1, 0.3, 1.0, 3.0, 10.0, 30.0                          | <p>Chiral</p>    |
| filipin       | 0.003, 0.01, 0.03, 0.1, 0.3, 1.0, 3.0, 10.0                         | <p>Chiral</p>  |
| floxuridine   | 0.03, 0.1, 0.3, 1.0, 3.0, 10.0, 30.0, 100.0                         |                |

Continues on the next page

Table S3: continued from the previous page

| Compound name | Concentrations [ $\mu\text{M}$ ]                         | Structure                                                                                           |
|---------------|----------------------------------------------------------|-----------------------------------------------------------------------------------------------------|
| forskolin     | 0.01, 0.03, 0.1, 0.3, 1.0, 3.0, 10.0, 30.0               | <p>Chiral</p> 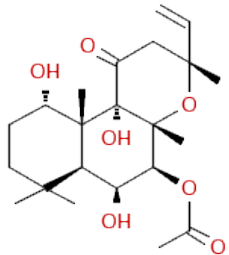   |
| genistein     | 0.03, 0.1, 0.3, 1.0, 3.0, 10.0, 30.0, 100.0, 10000.0     |                  |
| herbimycin A  | 0.003, 0.01, 0.03, 0.1, 0.3, 1.0, 3.0, 10.0              | <p>Chiral</p>  |
| hydroxyurea   | 0.3, 1.0, 3.0, 10.0, 30.0, 100.0, 300.0, 1000.0, 10000.0 |                |

Continues on the next page



**Table S3:** continued from the previous page

| Compound name      | Concentrations [ $\mu\text{M}$ ]                     | Structure                                                                             |
|--------------------|------------------------------------------------------|---------------------------------------------------------------------------------------|
| indirubin monoxime | 0.003, 0.01, 0.03, 0.1, 0.3, 1.0, 3.0, 10.0          | 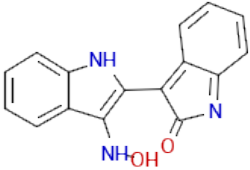   |
| jasplakinolide     | 0.0003, 0.001, 0.003, 0.01, 0.03, 0.1, 0.3, 1.0      |    |
| lactacystin        | 0.003, 0.01, 0.03, 0.1, 0.3, 1.0, 3.0, 10.0, 10000.0 |   |
| latrunculin B      | 0.003, 0.01, 0.03, 0.1, 0.3, 1.0, 3.0, 10.0, 30.0    |  |

*Continues on the next page*

Table S3: continued from the previous page

| Compound name        | Concentrations [ $\mu\text{M}$ ]                                                          | Structure                                                                             |
|----------------------|-------------------------------------------------------------------------------------------|---------------------------------------------------------------------------------------|
|                      |                                                                                           | Chiral                                                                                |
| leupeptin            | 0.006, 0.015, 0.02, 0.05, 0.06, 0.15, 0.2, 0.5, 0.6, 1.5, 2.0, 5.0, 6.0, 15.0, 20.0, 50.0 | 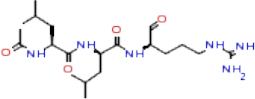   |
|                      |                                                                                           | Chiral                                                                                |
| methotrexate         | 0.003, 0.01, 0.03, 0.1, 0.3, 1.0, 3.0, 10.0, 10000.0                                      |    |
| methoxylamine        | 0.015, 0.05, 0.15, 0.5, 1.5, 5.0, 15.0, 50.0                                              |  |
| mevinolin/lovastatin | 0.015, 0.05, 0.15, 0.5, 1.5, 5.0, 15.0, 50.0                                              |  |

Continues on the next page

Table S3: continued from the previous page

| Compound name | Concentrations [ $\mu\text{M}$ ]                  | Structure                                                                                    |
|---------------|---------------------------------------------------|----------------------------------------------------------------------------------------------|
| mitomycin C   | 0.003, 0.01, 0.03, 0.1, 0.3, 1.0, 3.0, 10.0       | 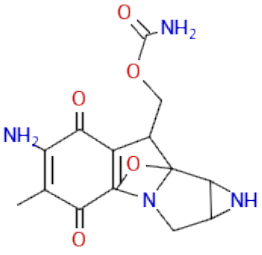          |
| mitoxantrone  | 0.003, 0.01, 0.03, 0.1, 0.3, 1.0, 3.0, 10.0       |           |
| monastrol     | 0.01, 0.03, 0.1, 0.3, 1.0, 3.0, 10.0, 30.0, 100.0 |         |
| neomycin      | 0.003, 0.01, 0.03, 0.1, 0.3, 1.0, 3.0, 10.0       |  Chiral |

Continues on the next page

**Table S3:** *continued from the previous page*

| Compound name | Concentrations [ $\mu\text{M}$ ]                                                         | Structure                                                                                                                                                                                                                                                                     |
|---------------|------------------------------------------------------------------------------------------|-------------------------------------------------------------------------------------------------------------------------------------------------------------------------------------------------------------------------------------------------------------------------------|
| nocodazole    | 0.001, 0.003, 0.01, 0.03, 0.1, 0.3, 1.0, 3.0, 10.0                                       | 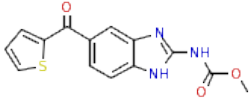 <p>Chemical structure of nocodazole, a microtubule inhibitor. It features a thienopyridine core with a thienyl group at the 2-position and a methylcarbamoyl group at the 4-position.</p> |
| nystatin      | 0.003, 0.006, 0.01, 0.02, 0.03, 0.06, 0.1, 0.2, 0.3, 0.6, 1.0, 2.0, 3.0, 6.0, 10.0, 20.0 |  <p>Chemical structure of nystatin, a polyene antifungal. It consists of a long polyene chain with multiple conjugated double bonds, a diene chain, and a dihydroxyphenylamino group.</p>  |
| okadaic acid  | 6e-05, 0.0002, 0.0006, 0.002, 0.006, 0.02, 0.06, 0.2                                     |  <p>Chemical structure of okadaic acid, a complex polyether. It features a long chain with multiple ether linkages, hydroxyl groups, and a terminal dihydroxyphenylamino group.</p>      |
| olomoucine    | 0.003, 0.01, 0.03, 0.1, 0.3, 1.0, 3.0, 10.0                                              |  <p>Chemical structure of olomoucine, a purine derivative. It features a purine core with a benzyl group at the 6-position and a propylamino group at the 2-position.</p>                |

Chiral

Chiral

*Continues on the next page*

**Table S3:** *continued from the previous page*

| Compound name          | Concentrations [ $\mu\text{M}$ ]                        | Structure                                                                                                                    |
|------------------------|---------------------------------------------------------|------------------------------------------------------------------------------------------------------------------------------|
| podophyllotoxin        | 3e-06, 1e-05, 3e-05, 0.0001, 0.0003, 0.001, 0.003, 0.01 | <p style="text-align: right;">Chiral</p> 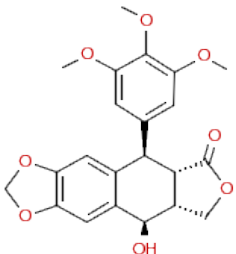 |
| proteasome inhibitor I | 0.003, 0.01, 0.03, 0.1, 0.3, 1.0, 3.0, 10.0             |                                           |
| puromycin              | 0.03, 0.1, 0.3, 1.0, 3.0, 10.0, 30.0, 100.0             |                                         |
| quercetin              | 0.003, 0.01, 0.03, 0.1, 0.3, 1.0, 3.0, 10.0             |                                         |

*Continues on the next page*

**Table S3:** continued from the previous page

| Compound name | Concentrations [ $\mu\text{M}$ ]                     | Structure                                                                                                                                                                                                                                                                                                                                                       |
|---------------|------------------------------------------------------|-----------------------------------------------------------------------------------------------------------------------------------------------------------------------------------------------------------------------------------------------------------------------------------------------------------------------------------------------------------------|
| raloxifene    | 0.0015, 0.005, 0.015, 0.05, 0.15, 0.5, 1.5, 5.0      | 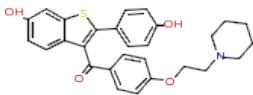 <p>Chemical structure of raloxifene, a selective estrogen receptor modulator. It features a central chromane ring system with a hydroxyl group at position 7, a sulfur atom at position 8, and a 2-(4-piperidinyl)ethoxy group at position 11.</p>                          |
| rapamycin     | 0.003, 0.01, 0.03, 0.1, 0.3, 1.0, 3.0, 10.0, 10000.0 |  <p>Chemical structure of rapamycin (rapamycinol), a complex polycyclic molecule with multiple hydroxyl and methoxy groups, and a piperidine ring.</p> <p>Chiral</p>                                                                                                         |
| roscovitine   | 0.003, 0.01, 0.03, 0.1, 0.3, 1.0, 3.0, 10.0          |  <p>Chemical structure of roscovitine, a purine alkaloid. It consists of a purine ring system with a benzyl group at position 6 and a 2-hydroxyethyl group at position 9.</p> <p>Chiral</p>                                                                                |
| simvastatin   | 0.006, 0.02, 0.06, 0.2, 0.6, 2.0, 6.0, 20.0          |  <p>Chemical structure of simvastatin, a statin. It features a dihydroquinoline ring system with a hydroxyl group at position 4, a methyl group at position 5, and a side chain containing a diethylcarbamoyl group and a hydroxyl group at position 10.</p> <p>Chiral</p> |

*Continues on the next page*

**Table S3:** continued from the previous page

| Compound name   | Concentrations [ $\mu\text{M}$ ]                       | Structure                                                                                    |
|-----------------|--------------------------------------------------------|----------------------------------------------------------------------------------------------|
| sodium butyrate | 0.083, 0.25, 0.83, 2.5, 8.3, 25.0, 83.0, 250.0         | 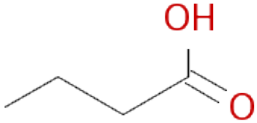          |
| sodium fluoride | 0.15, 0.5, 1.5, 5.0, 15.0, 50.0, 150.0, 500.0, 10000.0 | $\text{F}^-$ $\text{Na}^+$                                                                   |
| staurosporine   | 0.0003, 0.001, 0.003, 0.01, 0.03, 0.1, 0.3, 1.0        |  Chiral |
| taurocholate    | 0.0083, 0.025, 0.083, 0.25, 0.83, 2.5, 8.3, 25.0       |  Chiral |

*Continues on the next page*

**Table S3:** continued from the previous page

| Compound name | Concentrations [ $\mu\text{M}$ ]                         | Structure                                                                             |
|---------------|----------------------------------------------------------|---------------------------------------------------------------------------------------|
|               |                                                          | Chiral                                                                                |
| taxol         | 0.001, 0.003, 0.01, 0.03, 0.1, 0.3, 1.0, 3.0             | 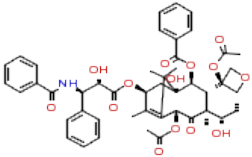   |
| temozolomide  | 0.006, 0.02, 0.06, 0.2, 0.6, 2.0, 6.0, 20.0              |    |
| trichostatin  | 0.0003, 0.001, 0.003, 0.01, 0.03, 0.1, 0.3, 1.0, 10000.0 |  |
|               |                                                          | Chiral                                                                                |
| tunicamycin   | 0.015, 0.05, 0.15, 0.5, 1.5, 5.0, 15.0, 50.0             |  |

*Continues on the next page*



Table S3: continued from the previous page

| Compound name | Concentrations [ $\mu\text{M}$ ]                     | Structure                                                                                                                                                                                                           |
|---------------|------------------------------------------------------|---------------------------------------------------------------------------------------------------------------------------------------------------------------------------------------------------------------------|
| valproic acid | 0.15, 0.5, 1.5, 5.0, 15.0, 50.0, 150.0, 500.0        | 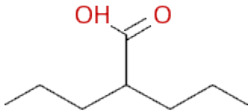<br><chem>CCCC(=O)O</chem>                                                                                                       |
| vinblastine   | 0.003, 0.01, 0.03, 0.1, 0.3, 1.0, 3.0, 10.0, 10000.0 | <br>Chiral<br><chem>CN1CC[C@H]2[C@@H](C(=O)OC)[C@H]3[C@@H](C1)C=C4[C@@H](C(=O)OC)C[C@H]5[C@@H](C(=O)OC)C[C@H](C=C4N5)C3</chem>   |
| vincristine   | 0.003, 0.01, 0.03, 0.1, 0.3, 1.0, 3.0, 10.0          | <br>Chiral<br><chem>CN1CC[C@H]2[C@@H](C(=O)OC)[C@H]3[C@@H](C1)C=C4[C@@H](C(=O)OC)C[C@H]5[C@@H](C(=O)OC)C[C@H](C=C4N5)C3</chem> |

**Table S4:** Sizes of the phenotypic subpopulations visible to the eye in four compounds in different mechanistic classes, based on inspection of three fields of view in each of two replicate samples for each compound.

| Mechanism                 | Compound    | Concentration [μM] | Prevalence of phenotype [%] |           |                     |                 |         |                           |                             |                                     |
|---------------------------|-------------|--------------------|-----------------------------|-----------|---------------------|-----------------|---------|---------------------------|-----------------------------|-------------------------------------|
|                           |             |                    | Mitotic                     | Monoaster | Frag-mented nucleus | Diffuse tubulin | Control | Large cell, large nucleus | Large cell, multiple nuclei | Large nucleus, multiple micronuclei |
| Microtubule stabilizer    | taxol       | 1.0                | 27                          | 3         | 0                   | 0               | 0       | 0                         | 2                           | 24                                  |
| Microtubule destabilizers | demecolcine | 1.0                | 44                          | 0         | 27                  | 16              | 12      | 0                         | 0                           | 0                                   |
| Aurora kinase inhibitors  | AZ-A        | 1.0                | 1                           | 0         | 3                   | 0               | 11      | 35                        | 50                          | 0                                   |
| Eg5 inhibitors            | AZ-C        | 0.1                | 13                          | 13        | 7                   | 9               | 11      | 4                         | 2                           | 4                                   |

**Table S5:** The 15 most important image features for distinguishing each mechanism of action using the means method.

| Mechanism of action      | Rank | Score    | Image feature                                       |
|--------------------------|------|----------|-----------------------------------------------------|
| Actin disruptors         | 1    | 0.281215 | Cytoplasm_Texture_GaborY_CorrActin_3                |
|                          | 2    | 0.267669 | Cytoplasm_Texture_GaborX_CorrActin_3                |
|                          | 3    | 0.208613 | Cells_Texture_GaborY_CorrActin_3                    |
|                          | 4    | 0.187357 | Cells_Texture_GaborX_CorrActin_3                    |
|                          | 5    | 0.167390 | Nuclei_Texture_SumVariance_CorrDAPI_3               |
|                          | 6    | 0.159650 | Cytoplasm_Intensity_UpperQuartileIntensity_CorrTub  |
|                          | 7    | 0.156146 | Cells_Intensity_MedianIntensity_CorrTub             |
|                          | 8    | 0.153290 | Nuclei_Texture_Variance_CorrDAPI_3                  |
|                          | 9    | 0.152532 | Nuclei_Texture_GaborY_CorrActin_3                   |
|                          | 10   | 0.147827 | Nuclei_Texture_SumVariance_CorrDAPI_10              |
|                          | 11   | 0.138384 | Nuclei_Texture_GaborX_CorrActin_3                   |
|                          | 12   | 0.124821 | Cytoplasm_Intensity_StdIntensity_CorrTub            |
|                          | 13   | 0.114793 | Nuclei_Texture_SumEntropy_CorrDAPI_10               |
|                          | 14   | 0.113721 | Nuclei_Intensity_LowerQuartileIntensity_CorrTub     |
|                          | 15   | 0.104418 | Cytoplasm_Intensity_MeanIntensity_CorrTub           |
| Aurora kinase inhibitors | 1    | 0.179038 | Cells_Intensity_IntegratedIntensityEdge_CorrTub     |
|                          | 2    | 0.164493 | Cells_Intensity_IntegratedIntensity_CorrTub         |
|                          | 3    | 0.152114 | Cytoplasm_Intensity_IntegratedIntensity_CorrTub     |
|                          | 4    | 0.119348 | Nuclei_Texture_DifferenceEntropy_CorrDAPI_10        |
|                          | 5    | 0.097981 | Cytoplasm_Intensity_IntegratedIntensityEdge_CorrTub |
|                          | 6    | 0.096588 | Cytoplasm_AreaShape_Area                            |
|                          | 7    | 0.088599 | Nuclei_Texture_DifferenceVariance_CorrDAPI_10       |
|                          | 8    | 0.087314 | Nuclei_Intensity_MeanIntensityEdge_CorrActin        |
|                          | 9    | 0.074868 | Cells_AreaShape_Area                                |
|                          | 10   | 0.070440 | Nuclei_Texture_GaborY_CorrTub_3                     |
|                          | 11   | 0.068690 | Cytoplasm_Texture_Correlation_CorrTub_10            |
|                          | 12   | 0.065225 | Cytoplasm_AreaShape_Perimeter                       |
|                          | 13   | 0.065225 | Cells_AreaShape_Perimeter                           |
|                          | 14   | 0.063790 | Nuclei_Intensity_UpperQuartileIntensity_CorrActin   |
|                          | 15   | 0.063738 | Cells_Intensity_UpperQuartileIntensity_CorrActin    |
| Cholesterol-lowering     | 1    | 0.093230 | Nuclei_Intensity_IntegratedIntensityEdge_CorrDAPI   |
|                          | 2    | 0.084346 | Cells_AreaShape_Extent                              |
|                          | 3    | 0.081998 | Cells_Texture_GaborX_CorrTub_3                      |
|                          | 4    | 0.080526 | Nuclei_Intensity_MinIntensityEdge_CorrDAPI          |
|                          | 5    | 0.080094 | Nuclei_Intensity_MinIntensity_CorrDAPI              |
|                          | 6    | 0.074491 | Nuclei_Texture_DifferenceEntropy_CorrDAPI_10        |
|                          | 7    | 0.072067 | Nuclei_Texture_GaborX_CorrTub_10                    |
|                          | 8    | 0.069402 | Nuclei_Texture_GaborY_CorrTub_10                    |

*Continues on the next page*

**Table S5:** *continued from the previous page*

| Mechanism of action | Rank     | Score                                          | Image feature                                      |
|---------------------|----------|------------------------------------------------|----------------------------------------------------|
| DNA damage          | 9        | 0.066591                                       | Cells_Texture_Correlation_CorrTub_10               |
|                     | 10       | 0.058949                                       | Cells_Zernike_3_1                                  |
|                     | 11       | 0.056188                                       | Cytoplasm_Texture_InfoMeas2_CorrTub_3              |
|                     | 12       | 0.053279                                       | Nuclei_Texture_Contrast_CorrDAPI_10                |
|                     | 13       | 0.052195                                       | Nuclei_Texture_InverseDifferenceMoment_CorrDAPI_10 |
|                     | 14       | 0.050724                                       | Cytoplasm_Texture_InfoMeas1_CorrTub_3              |
|                     | 15       | 0.050655                                       | Cytoplasm_Texture_GaborX_CorrTub_3                 |
|                     | 1        | 0.045092                                       | Cytoplasm_Intensity_IntegratedIntensity_CorrTub    |
|                     | 2        | 0.044668                                       | Cytoplasm_Intensity_MeanIntensity_CorrTub          |
|                     | 3        | 0.043116                                       | Cells_Intensity_MeanIntensityEdge_CorrTub          |
|                     | 4        | 0.040310                                       | Nuclei_Intensity_MaxIntensity_CorrActin            |
|                     | 5        | 0.039393                                       | Cells_Neighbors_PercentTouching_10                 |
|                     | 6        | 0.039011                                       | Cytoplasm_Intensity_MedianIntensity_CorrTub        |
|                     | 7        | 0.038127                                       | Nuclei_Neighbors_PercentTouching_10                |
|                     | 8        | 0.035094                                       | Nuclei_Intensity_MeanIntensity_CorrActin           |
| 9                   | 0.034896 | Cytoplasm_AreaShape_FormFactor                 |                                                    |
| 10                  | 0.034740 | Nuclei_Neighbors_PercentTouching_20            |                                                    |
| 11                  | 0.033824 | Cytoplasm_Intensity_StdIntensityEdge_CorrActin |                                                    |
| 12                  | 0.033655 | Cells_Intensity_MedianIntensity_CorrTub        |                                                    |
| 13                  | 0.032402 | Cells_Intensity_StdIntensityEdge_CorrTub       |                                                    |
| 14                  | 0.031690 | Cytoplasm_Intensity_StdIntensity_CorrActin     |                                                    |
| 15                  | 0.031184 | Nuclei_Intensity_StdIntensityEdge_CorrDAPI     |                                                    |
| DNA replication     | 1        | 0.079445                                       | Nuclei_Neighbors_PercentTouching_20                |
|                     | 2        | 0.060039                                       | Nuclei_Neighbors_NumberOfNeighbors_20              |
|                     | 3        | 0.045092                                       | Cytoplasm_Intensity_IntegratedIntensity_CorrTub    |
|                     | 4        | 0.044645                                       | Cells_Intensity_UpperQuartileIntensity_CorrTub     |
|                     | 5        | 0.042304                                       | Nuclei_Texture_SumEntropy_CorrDAPI_3               |
|                     | 6        | 0.040094                                       | Cytoplasm_Texture_GaborY_CorrActin_3               |
|                     | 7        | 0.039256                                       | Nuclei_Neighbors_PercentTouching_10                |
|                     | 8        | 0.037857                                       | Nuclei_Texture_InfoMeas1_CorrDAPI_10               |
|                     | 9        | 0.037525                                       | Nuclei_Texture_InfoMeas1_CorrDAPI_3                |
|                     | 10       | 0.035017                                       | Cytoplasm_Intensity_UpperQuartileIntensity_CorrTub |
|                     | 11       | 0.033534                                       | Cytoplasm_AreaShape_Solidity                       |
|                     | 12       | 0.032936                                       | Cytoplasm_Intensity_MeanIntensityEdge_CorrTub      |
|                     | 13       | 0.032238                                       | Cytoplasm_Intensity_IntegratedIntensity_CorrActin  |
|                     | 14       | 0.032039                                       | Nuclei_Intensity_MedianIntensity_CorrTub           |
|                     | 15       | 0.031169                                       | Cells_AreaShape_Area                               |
| Eg5 inhibitors      | 1        | 0.136123                                       | Cytoplasm_Texture_GaborX_CorrTub_10                |
|                     | 2        | 0.134797                                       | Nuclei_Intensity_StdIntensity_CorrTub              |
|                     | 3        | 0.133356                                       | Cytoplasm_Texture_GaborY_CorrTub_10                |
|                     | 4        | 0.101140                                       | Cells_Intensity_StdIntensity_CorrTub               |
|                     | 5        | 0.095494                                       | Nuclei_Intensity_MedianIntensity_CorrActin         |
|                     | 6        | 0.092331                                       | Nuclei_Intensity_MeanIntensity_CorrActin           |
|                     | 7        | 0.088028                                       | Cells_Texture_InfoMeas1_CorrTub_3                  |
|                     | 8        | 0.087820                                       | Nuclei_Intensity_LowerQuartileIntensity_CorrActin  |
|                     | 9        | 0.082726                                       | Cells_Texture_SumVariance_CorrTub_10               |
|                     | 10       | 0.080209                                       | Cells_Texture_InfoMeas2_CorrTub_3                  |
|                     | 11       | 0.077260                                       | Nuclei_Intensity_UpperQuartileIntensity_CorrActin  |
|                     | 12       | 0.075767                                       | Nuclei_Intensity_MeanIntensityEdge_CorrActin       |
|                     | 13       | 0.075408                                       | Nuclei_Texture_SumEntropy_CorrTub_10               |
|                     | 14       | 0.072718                                       | Cells_Intensity_StdIntensity_CorrActin             |

*Continues on the next page*

**Table S5:** *continued from the previous page*

| Mechanism of action       | Rank | Score    | Image feature                                       |
|---------------------------|------|----------|-----------------------------------------------------|
|                           | 15   | 0.071903 | Cells_Intensity_UpperQuartileIntensity_CorrActin    |
| Epithelial                | 1    | 0.225988 | Nuclei_Neighbors_NumberOfNeighbors_20               |
|                           | 2    | 0.204335 | Nuclei_Neighbors_NumberOfNeighbors_10               |
|                           | 3    | 0.153913 | Nuclei_Neighbors_PercentTouching_20                 |
|                           | 4    | 0.135766 | Nuclei_Neighbors_PercentTouching_10                 |
|                           | 5    | 0.096608 | Cytoplasm_Intensity_MinIntensity_CorrTub            |
|                           | 6    | 0.091836 | Cells_Intensity_MinIntensityEdge_CorrTub            |
|                           | 7    | 0.087701 | Cells_Intensity_MinIntensity_CorrTub                |
|                           | 8    | 0.085939 | Cytoplasm_Intensity_MinIntensityEdge_CorrTub        |
|                           | 9    | 0.081036 | Nuclei_Intensity_IntegratedIntensityEdge_CorrTub    |
|                           | 10   | 0.066969 | Nuclei_Intensity_IntegratedIntensity_CorrTub        |
|                           | 11   | 0.060913 | Cells_AreaShape_FormFactor                          |
|                           | 12   | 0.055912 | Cytoplasm_Texture_Contrast_CorrTub_3                |
|                           | 13   | 0.053228 | Nuclei_Texture_Contrast_CorrDAPI_10                 |
|                           | 14   | 0.052187 | Cells_Intensity_IntegratedIntensity_CorrTub         |
|                           | 15   | 0.048274 | Cytoplasm_AreaShape_MinorAxisLength                 |
| Kinase inhibitors         | 1    | 0.134838 | Nuclei_Intensity_IntegratedIntensityEdge_CorrTub    |
|                           | 2    | 0.131200 | Cytoplasm_Intensity_IntegratedIntensityEdge_CorrTub |
|                           | 3    | 0.130932 | Cytoplasm_AreaShape_FormFactor                      |
|                           | 4    | 0.109810 | Cells_Intensity_IntegratedIntensityEdge_CorrTub     |
|                           | 5    | 0.098938 | Nuclei_Intensity_MeanIntensity_CorrDAPI             |
|                           | 6    | 0.098835 | Nuclei_Intensity_IntegratedIntensity_CorrDAPI       |
|                           | 7    | 0.093230 | Nuclei_Intensity_IntegratedIntensityEdge_CorrDAPI   |
|                           | 8    | 0.085660 | Nuclei_Intensity_UpperQuartileIntensity_CorrDAPI    |
|                           | 9    | 0.084234 | Nuclei_Texture_InfoMeas1_CorrDAPI_3                 |
|                           | 10   | 0.077387 | Nuclei_Intensity_MedianIntensity_CorrDAPI           |
|                           | 11   | 0.073766 | Cytoplasm_AreaShape_Area                            |
|                           | 12   | 0.069723 | Nuclei_Intensity_MaxIntensity_CorrDAPI              |
|                           | 13   | 0.069517 | Cytoplasm_Texture_InfoMeas1_CorrActin_10            |
|                           | 14   | 0.066969 | Nuclei_Intensity_IntegratedIntensity_CorrTub        |
|                           | 15   | 0.066534 | Cytoplasm_Texture_GaborX_CorrTub_3                  |
| Microtubule destabilizers | 1    | 0.066222 | Nuclei_Texture_AngularSecondMoment_CorrTub_10       |
|                           | 2    | 0.050640 | Nuclei_Texture_AngularSecondMoment_CorrTub_3        |
|                           | 3    | 0.050038 | Nuclei_Texture_SumVariance_CorrTub_3                |
|                           | 4    | 0.047789 | Nuclei_Texture_Correlation_CorrDAPI_3               |
|                           | 5    | 0.047526 | Nuclei_Intensity_IntegratedIntensityEdge_CorrActin  |
|                           | 6    | 0.045564 | Nuclei_Texture_InfoMeas1_CorrDAPI_3                 |
|                           | 7    | 0.043635 | Cells_Texture_Variance_CorrTub_10                   |
|                           | 8    | 0.039665 | Nuclei_Texture_InfoMeas2_CorrDAPI_3                 |
|                           | 9    | 0.036823 | Nuclei_Texture_SumVariance_CorrActin_10             |
|                           | 10   | 0.035998 | Nuclei_Intensity_StdIntensityEdge_CorrActin         |
|                           | 11   | 0.035751 | Nuclei_Texture_SumVariance_CorrTub_10               |
|                           | 12   | 0.035645 | Cells_Intensity_MeanIntensityEdge_CorrActin         |
|                           | 13   | 0.035200 | Cells_Intensity_StdIntensityEdge_CorrActin          |
|                           | 14   | 0.034137 | Nuclei_Texture_Variance_CorrTub_3                   |
|                           | 15   | 0.034126 | Cells_Texture_InfoMeas1_CorrActin_3                 |
| Microtubule stabilizers   | 1    | 0.266498 | Nuclei_Intensity_StdIntensityEdge_CorrTub           |
|                           | 2    | 0.230081 | Cytoplasm_Texture_AngularSecondMoment_CorrTub_3     |
|                           | 3    | 0.198321 | Cells_Texture_GaborY_CorrTub_10                     |
|                           | 4    | 0.191167 | Cytoplasm_Texture_SumEntropy_CorrTub_3              |

*Continues on the next page*

**Table S5:** *continued from the previous page*

| Mechanism of action | Rank | Score    | Image feature                                     |
|---------------------|------|----------|---------------------------------------------------|
|                     | 5    | 0.190461 | Cytoplasm_Texture_AngularSecondMoment_CorrTub_10  |
|                     | 6    | 0.189933 | Cytoplasm_Intensity_StdIntensityEdge_CorrTub      |
|                     | 7    | 0.185869 | Cells_Texture_GaborX_CorrTub_10                   |
|                     | 8    | 0.178724 | Cells_Texture_SumAverage_CorrTub_3                |
|                     | 9    | 0.174168 | Cells_Texture_SumAverage_CorrTub_10               |
|                     | 10   | 0.160962 | Cytoplasm_Texture_GaborY_CorrTub_10               |
|                     | 11   | 0.154275 | Nuclei_Intensity_StdIntensity_CorrTub             |
|                     | 12   | 0.153313 | Cytoplasm_Texture_SumAverage_CorrTub_3            |
|                     | 13   | 0.150168 | Cells_Intensity_StdIntensity_CorrTub              |
|                     | 14   | 0.150092 | Cytoplasm_Texture_SumEntropy_CorrTub_10           |
|                     | 15   | 0.149339 | Cytoplasm_Texture_SumAverage_CorrTub_10           |
| Protein degradation | 1    | 0.084139 | Cytoplasm_Texture_GaborX_CorrTub_10               |
|                     | 2    | 0.083899 | Cytoplasm_Zernike_3_1                             |
|                     | 3    | 0.081998 | Cytoplasm_Intensity_IntegratedIntensity_CorrActin |
|                     | 4    | 0.081266 | Cytoplasm_Texture_GaborY_CorrTub_10               |
|                     | 5    | 0.075760 | Cytoplasm_AreaShape_Area                          |
|                     | 6    | 0.071945 | Cytoplasm_AreaShape_Solidity                      |
|                     | 7    | 0.067088 | Cytoplasm_Texture_GaborX_CorrActin_10             |
|                     | 8    | 0.064361 | Cytoplasm_Zernike_0_0                             |
|                     | 9    | 0.056766 | Cytoplasm_Texture_GaborY_CorrActin_10             |
|                     | 10   | 0.056530 | Cells_Texture_GaborX_CorrActin_10                 |
|                     | 11   | 0.046923 | Cells_Texture_GaborY_CorrActin_10                 |
|                     | 12   | 0.045643 | Cells_Texture_Contrast_CorrActin_10               |
|                     | 13   | 0.045052 | Cytoplasm_AreaShape_Extent                        |
|                     | 14   | 0.044919 | Cells_Texture_GaborX_CorrTub_10                   |
|                     | 15   | 0.040845 | Cells_Texture_DifferenceVariance_CorrActin_10     |
| Protein synthesis   | 1    | 0.092005 | Cytoplasm_Texture_Correlation_CorrActin_3         |
|                     | 2    | 0.086052 | Cells_Texture_Correlation_CorrActin_3             |
|                     | 3    | 0.068384 | Cytoplasm_Texture_DifferenceVariance_CorrActin_3  |
|                     | 4    | 0.066499 | Cells_Texture_DifferenceVariance_CorrActin_3      |
|                     | 5    | 0.064255 | Cytoplasm_Texture_Contrast_CorrTub_3              |
|                     | 6    | 0.053710 | Cytoplasm_Texture_SumAverage_CorrActin_3          |
|                     | 7    | 0.053177 | Cytoplasm_Texture_Contrast_CorrActin_3            |
|                     | 8    | 0.052644 | Cells_Texture_InfoMeas1_CorrActin_3               |
|                     | 9    | 0.051165 | Cells_Texture_SumVariance_CorrTub_3               |
|                     | 10   | 0.050724 | Cytoplasm_Texture_InfoMeas1_CorrTub_3             |
|                     | 11   | 0.050487 | Cytoplasm_Texture_GaborX_CorrTub_3                |
|                     | 12   | 0.048193 | Cells_Texture_SumVariance_CorrTub_10              |
|                     | 13   | 0.045031 | Cells_Texture_Variance_CorrTub_10                 |
|                     | 14   | 0.041479 | Nuclei_Intensity_MinIntensityEdge_CorrActin       |
|                     | 15   | 0.038174 | Cells_Intensity_LowerQuartileIntensity_CorrActin  |

**Table S6:** The number of times each feature was selected by the SVMRFE method. Only the 20 most selected features are shown.

| Feature                                          | Number of times selected |
|--------------------------------------------------|--------------------------|
| Cells_Neighbors_NumberOfNeighbors_10             | 171                      |
| Cytoplasm_Texture_GaborY_CorrTub_10              | 138                      |
| Cytoplasm_Texture_GaborX_CorrTub_10              | 133                      |
| Cells_Neighbors_PercentTouching_3                | 115                      |
| Cells_Neighbors_NumberOfNeighbors_3              | 112                      |
| Nuclei_Intensity_LowerQuartileIntensity_CorrDAPI | 105                      |
| Cells_Intensity_IntegratedIntensityEdge_CorrTub  | 85                       |
| Cytoplasm_Texture_GaborX_CorrActin_10            | 79                       |
| Nuclei_Intensity_MinIntensityEdge_CorrDAPI       | 78                       |
| Nuclei_AreaShape_FormFactor                      | 77                       |
| Cells_Neighbors_PercentTouching_10               | 74                       |
| Nuclei_Intensity_MaxIntensity_CorrTub            | 74                       |
| Nuclei_Intensity_MedianIntensity_CorrDAPI        | 74                       |
| Nuclei_Texture_SumAverage_CorrDAPI_3             | 73                       |
| Nuclei_Texture_SumAverage_CorrDAPI_10            | 72                       |
| Nuclei_Intensity_MinIntensity_CorrDAPI           | 69                       |
| Cells_Intensity_MeanIntensityEdge_CorrTub        | 68                       |
| Cytoplasm_Texture_GaborY_CorrActin_10            | 67                       |
| Cells_Intensity_StdIntensityEdge_CorrTub         | 65                       |
| Nuclei_Texture_SumVariance_CorrDAPI_3            | 61                       |

**Table S7:** Accuracies for all combinations of dimensionality-reducing preprocessing method and profiling method

| Dimensionality reduction method         | Profiling method |     |     |     |
|-----------------------------------------|------------------|-----|-----|-----|
|                                         | Means            | KS  | SVM | GM  |
| None                                    | 83%              | 83% | 81% | 81% |
| Factor analysis                         | 94%              | 90% | 80% | 84% |
| PCA                                     | 81%              | 90% | 73% | 73% |
| Factor-analysis-based feature selection | 67%              | 65% | 68% | 75% |

**Table S8:** The 15 features most heavily loaded onto each factor in the 50-factor model

| Factor number | Measurements                                  |
|---------------|-----------------------------------------------|
| 1             | Nuclei_Texture_GaborY_CorrDAPI_10             |
|               | Nuclei_Intensity_StdIntensityEdge_CorrActin   |
|               | Nuclei_Texture_Variance_CorrDAPI_3            |
|               | Nuclei_Texture_Entropy_CorrActin_10           |
|               | Nuclei_Texture_GaborX_CorrDAPI_10             |
| 2             | Nuclei_Texture_DifferenceEntropy_CorrDAPI_10  |
|               | Nuclei_Texture_Contrast_CorrDAPI_10           |
|               | Cytoplasm_Texture_InfoMeas2_CorrTub_3         |
|               | Nuclei_Texture_DifferenceVariance_CorrDAPI_10 |
|               | Cytoplasm_Texture_SumVariance_CorrTub_3       |

*Continues on the next page*

**Table S8:** *continued from the previous page*

| Factor number | Measurements                                           |
|---------------|--------------------------------------------------------|
| 3             | Cells_Zernike_1_1                                      |
|               | Cells_Zernike_0_0                                      |
|               | Cells_Neighbors_FirstClosestYVector_10                 |
|               | Cells_Neighbors_FirstClosestYVector_3                  |
|               | Cytoplasm_Zernike_1_1                                  |
| 4             | Nuclei_Texture_AngularSecondMoment_CorrTub_3           |
|               | Nuclei_Texture_Entropy_CorrTub_3                       |
|               | Nuclei_Intensity_MinIntensity_CorrTub                  |
|               | Nuclei_Intensity_MinIntensityEdge_CorrTub              |
|               | Cells_Texture_AngularSecondMoment_CorrTub_3            |
| 5             | Nuclei_Texture_SumEntropy_CorrTub_10                   |
|               | Nuclei_Texture_SumAverage_CorrTub_10                   |
|               | Cells_Texture_SumAverage_CorrTub_10                    |
|               | Nuclei_Texture_SumAverage_CorrTub_3                    |
|               | Nuclei_Texture_Entropy_CorrTub_10                      |
| 6             | Cells_Intensity_IntegratedIntensityEdge_CorrTub        |
|               | Cytoplasm_Texture_InfoMeas2_CorrActin_3                |
|               | Nuclei_Texture_SumEntropy_CorrActin_3                  |
|               | Nuclei_Texture_DifferenceEntropy_CorrTub_3             |
|               | Cytoplasm_Texture_InfoMeas1_CorrActin_3                |
| 7             | Nuclei_Zernike_2_0                                     |
|               | Nuclei_Zernike_0_0                                     |
|               | Nuclei_AreaShape_Eccentricity                          |
|               | Nuclei_Zernike_1_1                                     |
|               | Nuclei_Zernike_2_2                                     |
| 8             | Nuclei_Texture_DifferenceEntropy_CorrTub_10            |
|               | Nuclei_Texture_Entropy_CorrTub_10                      |
|               | Nuclei_Texture_SumEntropy_CorrTub_3                    |
|               | Nuclei_Texture_DifferenceEntropy_CorrDAPI_10           |
|               | Nuclei_Texture_Contrast_CorrDAPI_10                    |
| 9             | Cells_AreaShape_FormFactor                             |
|               | Cytoplasm_Texture_InverseDifferenceMoment_CorrActin_10 |
|               | Cells_Neighbors_PercentTouching_3                      |
|               | Cytoplasm_AreaShape_Perimeter                          |
|               | Cells_AreaShape_Perimeter                              |
| 10            | Cells_Intensity_MeanIntensityEdge_CorrTub              |
|               | Cytoplasm_Intensity_MeanIntensityEdge_CorrTub          |
|               | Cytoplasm_Intensity_MeanIntensity_CorrTub              |
|               | Cytoplasm_Intensity_LowerQuartileIntensity_CorrTub     |
|               | Cytoplasm_Intensity_MedianIntensity_CorrTub            |

*Continues on the next page*

**Table S8:** *continued from the previous page*

| Factor number | Measurements                                       |
|---------------|----------------------------------------------------|
| 11            | Nuclei_Texture_Entropy_CorrTub_10                  |
|               | Nuclei_Texture_Entropy_CorrTub_3                   |
|               | Cytoplasm_AreaShape_MinorAxisLength                |
|               | Nuclei_Texture_AngularSecondMoment_CorrTub_3       |
| 12            | Cells_AreaShape_MinorAxisLength                    |
|               | Cells_Neighbors_SecondClosestYVector_3             |
|               | Cells_Neighbors_SecondClosestYVector_10            |
|               | Cytoplasm_Texture_InfoMeas2_CorrTub_3              |
|               | Nuclei_Texture_InfoMeas2_CorrTub_3                 |
| 13            | Nuclei_Texture_InfoMeas1_CorrTub_3                 |
|               | Nuclei_Texture_DifferenceEntropy_CorrActin_3       |
|               | Nuclei_Texture_Contrast_CorrActin_3                |
|               | Nuclei_Texture_InverseDifferenceMoment_CorrDAPI_3  |
|               | Nuclei_Texture_InverseDifferenceMoment_CorrActin_3 |
| 14            | Nuclei_Texture_DifferenceVariance_CorrActin_3      |
|               | Cells_Texture_Correlation_CorrTub_3                |
|               | Cytoplasm_Texture_Correlation_CorrTub_3            |
|               | Cells_Texture_InfoMeas2_CorrTub_3                  |
|               | Cells_Texture_SumEntropy_CorrTub_10                |
| 15            | Cells_Texture_SumEntropy_CorrTub_3                 |
|               | Cells_Texture_Variance_CorrActin_3                 |
|               | Nuclei_Texture_Variance_CorrActin_3                |
|               | Cells_Texture_Entropy_CorrActin_3                  |
|               | Cells_Texture_Variance_CorrActin_10                |
| 16            | Nuclei_Texture_SumVariance_CorrActin_3             |
|               | Cytoplasm_Texture_Correlation_CorrActin_3          |
|               | Cytoplasm_Texture_InfoMeas2_CorrActin_3            |
|               | Nuclei_Texture_SumVariance_CorrTub_3               |
|               | Nuclei_Texture_Variance_CorrTub_3                  |
| 17            | Cells_Texture_SumEntropy_CorrActin_3               |
|               | Nuclei_Texture_Entropy_CorrActin_3                 |
|               | Nuclei_Texture_AngularSecondMoment_CorrActin_3     |
|               | Nuclei_Texture_Entropy_CorrActin_10                |
|               | Nuclei_Texture_AngularSecondMoment_CorrActin_10    |
| 18            | Nuclei_Texture_SumEntropy_CorrActin_3              |
|               | Cells_Texture_Entropy_CorrTub_3                    |
|               | Cytoplasm_Texture_Entropy_CorrTub_3                |
|               | Cells_Texture_DifferenceEntropy_CorrTub_3          |
|               | Cells_Texture_AngularSecondMoment_CorrTub_3        |
|               | Cells_Texture_InverseDifferenceMoment_CorrTub_3    |

*Continues on the next page*



**Table S8:** *continued from the previous page*

| Factor number | Measurements                                       |
|---------------|----------------------------------------------------|
| 19            | Cells_Intensity_MinIntensityEdge_CorrActin         |
|               | Cytoplasm_Intensity_MinIntensityEdge_CorrActin     |
|               | Cytoplasm_Intensity_MinIntensity_CorrActin         |
|               | Cells_Intensity_MinIntensity_CorrActin             |
|               | Cells_Intensity_MeanIntensityEdge_CorrActin        |
| 20            | Cells_Texture_Correlation_CorrTub_3                |
|               | Cells_Texture_InfoMeas1_CorrTub_3                  |
|               | Cytoplasm_Texture_Correlation_CorrActin_3          |
|               | Cytoplasm_Texture_Correlation_CorrTub_3            |
|               | Cells_Texture_InfoMeas2_CorrActin_3                |
| 21            | Cytoplasm_Texture_SumEntropy_CorrActin_10          |
|               | Cells_Texture_InverseDifferenceMoment_CorrTub_10   |
|               | Cytoplasm_Texture_Entropy_CorrActin_10             |
|               | Cytoplasm_Texture_SumEntropy_CorrActin_3           |
|               | Cytoplasm_Texture_AngularSecondMoment_CorrActin_10 |
| 22            | Cytoplasm_Intensity_StdIntensityEdge_CorrActin     |
|               | Cells_Intensity_StdIntensityEdge_CorrActin         |
|               | Cells_Intensity_StdIntensity_CorrActin             |
|               | Cytoplasm_Intensity_StdIntensity_CorrActin         |
|               | Nuclei_Intensity_StdIntensityEdge_CorrActin        |
| 23            | Nuclei_Intensity_UpperQuartileIntensity_CorrActin  |
|               | Nuclei_Intensity_IntegratedIntensity_CorrActin     |
|               | Nuclei_Texture_SumAverage_CorrActin_10             |
|               | Nuclei_Intensity_MedianIntensity_CorrActin         |
|               | Nuclei_Texture_SumAverage_CorrActin_3              |
| 24            | Nuclei_Intensity_IntegratedIntensityEdge_CorrTub   |
|               | Nuclei_Intensity_MeanIntensityEdge_CorrTub         |
|               | Nuclei_Intensity_MaxIntensityEdge_CorrTub          |
|               | Nuclei_Texture_Correlation_CorrActin_10            |
|               | Cytoplasm_Intensity_StdIntensityEdge_CorrTub       |
| 25            | Cytoplasm_Zernike_0_0                              |
|               | Cytoplasm_Zernike_1_1                              |
|               | Cytoplasm_Intensity_IntegratedIntensity_CorrTub    |
|               | Cells_AreaShape_MinorAxisLength                    |
|               | Cytoplasm_Intensity_IntegratedIntensity_CorrActin  |
| 26            | Nuclei_Intensity_IntegratedIntensityEdge_CorrTub   |
|               | Nuclei_Intensity_MaxIntensityEdge_CorrTub          |
|               | Cytoplasm_Intensity_MaxIntensityEdge_CorrTub       |
|               | Nuclei_Texture_SumEntropy_CorrDAPI_10              |
|               | Nuclei_Texture_SumVariance_CorrDAPI_10             |

*Continues on the next page*

**Table S8:** *continued from the previous page*

| Factor number | Measurements                                          |
|---------------|-------------------------------------------------------|
| 27            | Cytoplasm_Intensity_IntegratedIntensityEdge_CorrActin |
|               | Cells_Intensity_IntegratedIntensityEdge_CorrActin     |
|               | Nuclei_Intensity_MeanIntensityEdge_CorrActin          |
|               | Nuclei_Intensity_MinIntensityEdge_CorrActin           |
|               | Nuclei_Intensity_MinIntensity_CorrActin               |
| 28            | Nuclei_Texture_AngularSecondMoment_CorrDAPI_3         |
|               | Nuclei_Texture_Entropy_CorrDAPI_3                     |
|               | Cells_Texture_SumVariance_CorrTub_10                  |
|               | Nuclei_Texture_InverseDifferenceMoment_CorrDAPI_3     |
|               | Cells_Texture_SumVariance_CorrTub_3                   |
| 29            | Nuclei_Texture_DifferenceEntropy_CorrTub_3            |
|               | Nuclei_Texture_DifferenceVariance_CorrTub_3           |
|               | Nuclei_Texture_Contrast_CorrTub_3                     |
|               | Cells_Texture_SumVariance_CorrActin_10                |
|               | Nuclei_Texture_InverseDifferenceMoment_CorrTub_3      |
| 30            | Cells_Intensity_MeanIntensityEdge_CorrActin           |
|               | Cells_Intensity_MaxIntensityEdge_CorrActin            |
|               | Cytoplasm_Intensity_MaxIntensity_CorrActin            |
|               | Cytoplasm_Intensity_MeanIntensityEdge_CorrActin       |
|               | Cytoplasm_Intensity_MeanIntensity_CorrActin           |
| 31            | Cells_Intensity_MaxIntensityEdge_CorrTub              |
|               | Cells_Intensity_MeanIntensityEdge_CorrTub             |
|               | Cytoplasm_Texture_Correlation_CorrActin_3             |
|               | Cytoplasm_Intensity_MeanIntensityEdge_CorrTub         |
|               | Cytoplasm_Intensity_MaxIntensity_CorrTub              |
| 32            | Cytoplasm_Texture_Entropy_CorrActin_3                 |
|               | Cytoplasm_Texture_InverseDifferenceMoment_CorrActin_3 |
|               | Cytoplasm_Texture_AngularSecondMoment_CorrActin_3     |
|               | Cells_Texture_InverseDifferenceMoment_CorrActin_3     |
|               | Cytoplasm_Texture_DifferenceEntropy_CorrActin_3       |
| 33            | Nuclei_Texture_Correlation_CorrActin_3                |
|               | Nuclei_Texture_InfoMeas2_CorrActin_3                  |
|               | Nuclei_Texture_InfoMeas1_CorrActin_3                  |
|               | Nuclei_Texture_Correlation_CorrActin_10               |
|               | Cytoplasm_Intensity_MeanIntensity_CorrTub             |
| 34            | Nuclei_Intensity_IntegratedIntensity_CorrActin        |
|               | Nuclei_Intensity_IntegratedIntensityEdge_CorrActin    |
|               | Cells_Neighbors_FirstClosestYVector_10                |
|               | Cells_Neighbors_FirstClosestYVector_3                 |
|               | Cells_Neighbors_FirstClosestXVector_10                |

*Continues on the next page*

**Table S8:** *continued from the previous page*

| Factor number | Measurements                                                                                                                                                                                                                             |
|---------------|------------------------------------------------------------------------------------------------------------------------------------------------------------------------------------------------------------------------------------------|
| 35            | Cytoplasm_Intensity_StdIntensity_CorrTub<br>Cells_Texture_DifferenceVariance_CorrTub_10<br>Cytoplasm_AreaShape_Eccentricity<br>Cells_AreaShape_Eccentricity<br>Cytoplasm_Zernike_2_2                                                     |
| 36            | Cells_Intensity_LowerQuartileIntensity_CorrActin<br>Cells_Intensity_MedianIntensity_CorrActin<br>Cells_Intensity_MeanIntensity_CorrActin<br>Cytoplasm_Intensity_MedianIntensity_CorrActin<br>Cytoplasm_Intensity_MeanIntensity_CorrActin |
| 37            | Nuclei_Intensity_IntegratedIntensityEdge_CorrDAPI<br>Nuclei_AreaShape_Solidity<br>Nuclei_AreaShape_FormFactor<br>Nuclei_AreaShape_Extent<br>Nuclei_Intensity_MeanIntensityEdge_CorrDAPI                                                  |
| 38            | Cytoplasm_AreaShape_Solidity<br>Cytoplasm_AreaShape_Extent<br>Cytoplasm_Texture_Contrast_CorrActin_3<br>Cytoplasm_Intensity_MinIntensity_CorrTub<br>Cells_Intensity_MinIntensity_CorrTub                                                 |
| 39            | Nuclei_Texture_SumAverage_CorrDAPI_10<br>Nuclei_Intensity_StdIntensity_CorrTub<br>Nuclei_Texture_SumAverage_CorrDAPI_3<br>Nuclei_Texture_GaborX_CorrTub_10<br>Cells_Intensity_MaxIntensity_CorrTub                                       |
| 40            | Nuclei_Texture_Contrast_CorrDAPI_10<br>Nuclei_Texture_DifferenceVariance_CorrDAPI_10<br>Cells_Texture_DifferenceVariance_CorrActin_10<br>Nuclei_Texture_SumVariance_CorrDAPI_3<br>Cells_Texture_Contrast_CorrActin_10                    |
| 41            | Cytoplasm_Texture_SumAverage_CorrTub_10<br>Cytoplasm_Texture_SumAverage_CorrTub_3<br>Cells_Texture_SumAverage_CorrTub_3<br>Cells_Texture_SumAverage_CorrTub_10<br>Nuclei_Texture_SumAverage_CorrTub_10                                   |
| 42            | Cytoplasm_Texture_Contrast_CorrTub_10<br>Cytoplasm_Texture_DifferenceVariance_CorrTub_10<br>Cytoplasm_Texture_DifferenceEntropy_CorrTub_3<br>Cytoplasm_Intensity_UpperQuartileIntensity_CorrTub<br>Cells_Texture_Contrast_CorrTub_3      |

*Continues on the next page*

**Table S8:** *continued from the previous page*

| Factor number | Measurements                                                                               |
|---------------|--------------------------------------------------------------------------------------------|
| 43            | Cytoplasm_Intensity_IntegratedIntensityEdge_CorrTub                                        |
|               | Cells_Intensity_IntegratedIntensityEdge_CorrTub                                            |
|               | Nuclei_Texture_Entropy_CorrActin_3                                                         |
|               | Nuclei_Intensity_IntegratedIntensityEdge_CorrTub<br>Nuclei_Texture_SumEntropy_CorrActin_10 |
| 44            | Nuclei_AreaShape_Perimeter                                                                 |
|               | Nuclei_AreaShape_Area                                                                      |
|               | Nuclei_AreaShape_MajorAxisLength                                                           |
|               | Nuclei_Intensity_IntegratedIntensity_CorrDAPI                                              |
|               | Nuclei_AreaShape_MinorAxisLength                                                           |
| 45            | Cells_Zernike_3_1                                                                          |
|               | Cytoplasm_AreaShape_Eccentricity                                                           |
|               | Cells_AreaShape_Eccentricity                                                               |
|               | Cells_Zernike_0_0                                                                          |
|               | Cells_AreaShape_Solidity                                                                   |
| 46            | Nuclei_AreaShape_Eccentricity                                                              |
|               | Nuclei_Intensity_IntegratedIntensityEdge_CorrDAPI                                          |
|               | Nuclei_Zernike_0_0                                                                         |
|               | Nuclei_Intensity_MeanIntensityEdge_CorrDAPI                                                |
|               | Nuclei_Zernike_2_0                                                                         |
| 47            | Cells_Intensity_MinIntensity_CorrActin                                                     |
|               | Cytoplasm_Intensity_MinIntensity_CorrActin                                                 |
|               | Cytoplasm_Intensity_MinIntensityEdge_CorrActin                                             |
|               | Cells_Intensity_MinIntensityEdge_CorrActin                                                 |
|               | Nuclei_Neighbors_PercentTouching_10                                                        |
| 48            | Cells_Texture_SumAverage_CorrActin_3                                                       |
|               | Cells_Texture_SumAverage_CorrActin_10                                                      |
|               | Nuclei_Texture_Variance_CorrDAPI_3                                                         |
|               | Nuclei_Neighbors_SecondClosestXVector_20                                                   |
|               | Nuclei_Neighbors_SecondClosestXVector_10                                                   |
| 49            | Cells_Texture_DifferenceVariance_CorrTub_3                                                 |
|               | Cells_Texture_Contrast_CorrTub_3                                                           |
|               | Cytoplasm_Texture_DifferenceVariance_CorrTub_3                                             |
|               | Cytoplasm_Texture_Contrast_CorrTub_3                                                       |
|               | Cells_Texture_DifferenceEntropy_CorrTub_3                                                  |
| 50            | Cells_Texture_Correlation_CorrActin_10                                                     |
|               | Cells_Texture_InfoMeas2_CorrActin_3                                                        |
|               | Cells_Texture_Correlation_CorrActin_3                                                      |
|               | Cells_Texture_InfoMeas2_CorrActin_10                                                       |
|               | Nuclei_Texture_Contrast_CorrActin_3                                                        |

**Table S9:** Distribution of mechanisms of action across batches

| Mechanism of action       | Number of compounds | Batches                                |
|---------------------------|---------------------|----------------------------------------|
| Actin disruptors          | 3                   | 02, 01                                 |
| Aurora kinase inhibitors  | 3                   | 01, 04, 03                             |
| Cholesterol-lowering      | 2                   | 09                                     |
| DMSO                      | 1                   | 02, 10, 03, 01, 06, 08, 07, 09, 04, 05 |
| DNA damage                | 4                   | 04, 03                                 |
| DNA replication           | 4                   | 08, 02, 09                             |
| Eg5 inhibitors            | 2                   | 03, 10                                 |
| Epithelial                | 3                   | 05, 08, 10                             |
| Kinase inhibitors         | 3                   | 07                                     |
| Microtubule destabilizers | 4                   | 01, 03                                 |
| Microtubule stabilizers   | 3                   | 07, 01                                 |
| Protein degradation       | 4                   | 07, 02, 06                             |
| Protein synthesis         | 3                   | 04, 03                                 |

**Table S10:** AUCs and p-values for the five profiling methods

| Mechanism                 | Profiling method |          |              |          |                  |          |                  |          |                 |          |
|---------------------------|------------------|----------|--------------|----------|------------------|----------|------------------|----------|-----------------|----------|
|                           | Means            |          | KS statistic |          | SVM normalvector |          | Gaussian mixture |          | Factor analysis |          |
|                           | AUC              | p-value  | AUC          | p-value  | AUC              | p-value  | AUC              | p-value  | AUC             | p-value  |
| Actin disruptors          | 0.674            | 0.0295   | 0.914        | ≤ 0.0001 | 0.998            | ≤ 0.0001 | 0.689            | 0.0196   | 0.979           | ≤ 0.0001 |
| Aurora kinase inhibitors  | 1.000            | ≤ 0.0001 | 1.000        | ≤ 0.0001 | 0.988            | ≤ 0.0001 | 1.000            | ≤ 0.0001 | 1.000           | ≤ 0.0001 |
| Cholesterol-lowering      | 0.879            | ≤ 0.0001 | 0.966        | ≤ 0.0001 | 0.923            | ≤ 0.0001 | 0.741            | 0.0005   | 0.965           | ≤ 0.0001 |
| DNA damage                | 0.834            | ≤ 0.0001 | 0.742        | ≤ 0.0001 | 0.942            | ≤ 0.0001 | 0.868            | ≤ 0.0001 | 0.930           | ≤ 0.0001 |
| DNA replication           | 0.838            | ≤ 0.0001 | 0.708        | ≤ 0.0001 | 0.816            | ≤ 0.0001 | 0.834            | ≤ 0.0001 | 0.903           | ≤ 0.0001 |
| Eg5 inhibitors            | 0.987            | ≤ 0.0001 | 0.994        | ≤ 0.0001 | 0.984            | ≤ 0.0001 | 0.995            | ≤ 0.0001 | 1.000           | ≤ 0.0001 |
| Epithelial                | 0.973            | ≤ 0.0001 | 0.966        | ≤ 0.0001 | 0.924            | ≤ 0.0001 | 0.966            | ≤ 0.0001 | 0.978           | ≤ 0.0001 |
| Kinase inhibitors         | 0.999            | ≤ 0.0001 | 0.995        | ≤ 0.0001 | 0.993            | ≤ 0.0001 | 0.994            | ≤ 0.0001 | 1.000           | ≤ 0.0001 |
| Microtubule destabilizers | 0.852            | ≤ 0.0001 | 0.793        | ≤ 0.0001 | 0.881            | ≤ 0.0001 | 0.854            | ≤ 0.0001 | 0.865           | ≤ 0.0001 |
| Microtubule stabilizers   | 0.781            | ≤ 0.0001 | 0.804        | ≤ 0.0001 | 0.981            | ≤ 0.0001 | 0.955            | ≤ 0.0001 | 0.998           | ≤ 0.0001 |
| Protein degradation       | 0.722            | 0.0002   | 0.715        | 0.0003   | 0.716            | 0.0003   | 0.701            | 0.0007   | 0.816           | ≤ 0.0001 |
| Protein synthesis         | 0.976            | ≤ 0.0001 | 0.985        | ≤ 0.0001 | 0.997            | ≤ 0.0001 | 0.975            | ≤ 0.0001 | 0.997           | ≤ 0.0001 |
